# Supplementary material
Source: PubMed Central journal article supplement (PMC6442553)
Supplement: pnas.1815107116.sapp.pdf [file pnas.1815107116.sapp.pdf]

## Supplementary Information for

Wildfires and climate change push low-elevation forests across a critical climate threshold for tree regeneration

KT Davis, SZ Dobrowski, PE Higuera, ZA Holden, TT Veblen, MT Rother, SA Parks, A Sala, and MP Maneta

Corresponding author: KT Davis

Email: [Kimberley.Davis@umontana.edu](mailto:Kimberley.Davis@umontana.edu)

### **This PDF file includes:**

- Supplemental methods
- Supplemental results
- Figs. S1 to S22
- Tables S1 to S5
- References for SI reference citations

## Supplemental methods

### Site selection

Within each fire in the NR, SW, and CA, sampling areas were selected based on the following criteria: (1) sites burned at moderate to high severity based on the Monitoring Trends in Burn Severity (MTBS) dataset, (2) sites were within 1 km of a road, (3) sites had *P. ponderosa* and/or *P. menziesii* according to “Existing Vegetation” layers (from CALVEG for CA; from the US Forest Service for all other regions), and (4) sites had either northerly (315-45°) or southerly (135-225°) aspects. We excluded areas that had post-fire management based on the FACTS database, geospatial data from individual forests, field observations, and conversations with local silviculturalists. Using a GIS, two to 12 sampling points were randomly placed within these sampling areas (depending on sampling area size). Because we were targeting sites with regeneration, sampling points that were farther than 100 m from a live seed source were excluded. The goal was to sample at least two sites per fire, but in the cases of some large fires, up to eight sites were sampled. In a few fires in the NR, only one site per fire was sampled. Selection of fires and sites from CO are described in more detail by Rother & Veblen (ref. 1) but generally followed a similar sampling scheme. A total of 19 sites in CA, 10 in CO, 40 in NR, and 21 in SW were sampled (Table S1 & S2). The SW sites receive on average 54% of their annual precipitation between July and September, while this value declines to 32% for the CO sites, 13% for the NR sites and 3% for the CA sites.

### Bioclimatic data

Bioclimatic variables were calculated from gridded climate data from 1979-2015 with a resolution of 250 m at daily or sub-daily timescales (ref. 2), and then summarized to seasonal or annual values. To calculate mean summer VPD (June-August), daily minimum and maximum temperature and relative humidity, and daily net shortwave radiation were extracted from gridded datasets. Daily maximum VPD was calculated from the daily maximum temperature and daily minimum RH. The daily maximum saturation vapor pressure ( $e_s$ ) was first calculated from the maximum temperature. Daily maximum actual vapor pressure ( $e_a$ ) was then estimated using maximum temperature and minimum relative humidity. The VPD was then calculated as  $e_s$  minus  $e_a$ . Soil moisture and maximum land surface temperature (LST) were modeled using the ECH2O ecohydrology model (ref. 3) following methods described by Simeone et al. (ref. 4). Simulations were run at a 3-hr time step from 1979-2015 assuming sparse canopy cover (5%) and leaf area index (0.1). Soil moisture was modeled in the upper 10 cm of the soil profile using gridded maps of soil properties. Sub-daily soil moisture and maximum LST outputs were then summarized to produce daily maximum LST and daily mean soil moisture. Soil moisture at 0-10 cm, the depths reached by young conifer seedling roots, was summarized to mean soil moisture of the driest month of the growing season (March to October) and mean spring soil moisture (March to May). The maximum LST observed during each year was retrieved for each site. Climatic water balance deficit was calculated at a daily time step following methods described by Hoyleman et al. (ref. 5) and then summed for each year.

### **Boosted regression tree (BRT) models**

Binomial BRT models were fit to data from each species separately, using a region-specific threshold of annual juvenile recruitment rates (# juveniles ha<sup>-1</sup> yr<sup>-1</sup>) to convert annual regeneration rates to a binary response (Table S1). To test the sensitivity of our results to these thresholds, we additionally conducted our analysis using a 50<sup>th</sup> percentile threshold and juvenile presence/absence alone. In both cases we obtained similar results to the 25<sup>th</sup> percentile thresholds described in the manuscript (Figs. S3-S7).

For BRT models we set the bag fraction to 0.75 and tree complexity to three. We started with a learning rate of 0.005 and reduced it incrementally until the models produced at least 1000 trees (final learning rate was 0.002 for ponderosa pine model and 0.001 for Douglas-fir model). We tested predictive performance by leaving out each site, fitting a BRT model with the same settings as above, predicting the holdout site, and then calculating accuracy (defined as the proportion of years with correct prediction) and the AUC statistic. When calculating accuracy, the threshold for determining success or failure of recruitment from the modeled probabilities was the value that maximized specificity and sensitivity for each site (Youden's J statistic; ref. 6).

In addition to results presented in the manuscript, we also used the models to hindcast annual recruitment probability at each site based on the site-specific annual climate time series (1981-2015; Fig. S8) while varying time-since-fire from 1 to 10 years. Distance to seed source (50 m) and fire severity (412, the median across all sites) were held constant. We then calculated the cumulative recruitment probability over years 1-5 and 1-10 following a hypothetical fire in each year from 1980 to 2010 (for cumulative recruitment probabilities for post-fire years 1-5) or 1980 to 2005 (for cumulative recruitment probabilities for post-fire years 1-10). We averaged these cumulative recruitment probabilities for sites within each region.

### **Temporal variability in observed tree recruitment rates**

To quantify temporal variability in observed annual tree recruitment rates at each site and assess potential causes, we constructed age structures for each species-site combination (Figs. S14-S22). At each site, we calculated Pielou's evenness metric, which varied between 0.20 and 0.91, and indicates episodic (low values) or continuous (high values) recruitment (Fig. S13). We then modeled evenness as a linear function of tree species, shrub cover, 30-year mean (1980-2009) climatic water deficit (ref. 7), fire severity (dNBR), and all possible two-way interactions of these variables. Predictors and interactions that were not significant ( $P > 0.05$ ) were not retained in the final model. Shrub cover data were not collected in CO and thus CO sites were excluded from this analysis. The total sample size for this analysis was 72 sites.

## Supplemental results

### **BRT models**

The BRT models performed well when cross validation by site was performed, with mean accuracies of 0.72 and 0.77, and AUC values of 0.79 and 0.83 for the ponderosa pine and Douglas-fir models, respectively. The AUC values for both species were significantly higher than 0.50 ( $P < 0.001$ ; ref. 8). Accuracy and AUC were not biased by region (Fig. S2; Table S4).

### **Age structures**

Figs. S14-S22 display all age structures from this study that had regeneration. Sites that are not shown, because they had no regeneration are as follows: In CA: ANT1N, ANT1S\_ADJ, ANT2S, JKA1N, JKA3S\_ADJ, MLT4N, MLT4S, RAL2S; in NR: BIC1, CFY1N, CFY1S, CFY2S, EAR1, EZN12S, EZN1S, EZN2S, FH2S; in SW: PEP2BN, PEP2S\_ADJ, PEP3S, PEP5N, PEP5S, SED2S, SED3N, SED3S, SED6S, UN6N, UN7N. See Table S2 for site descriptions.

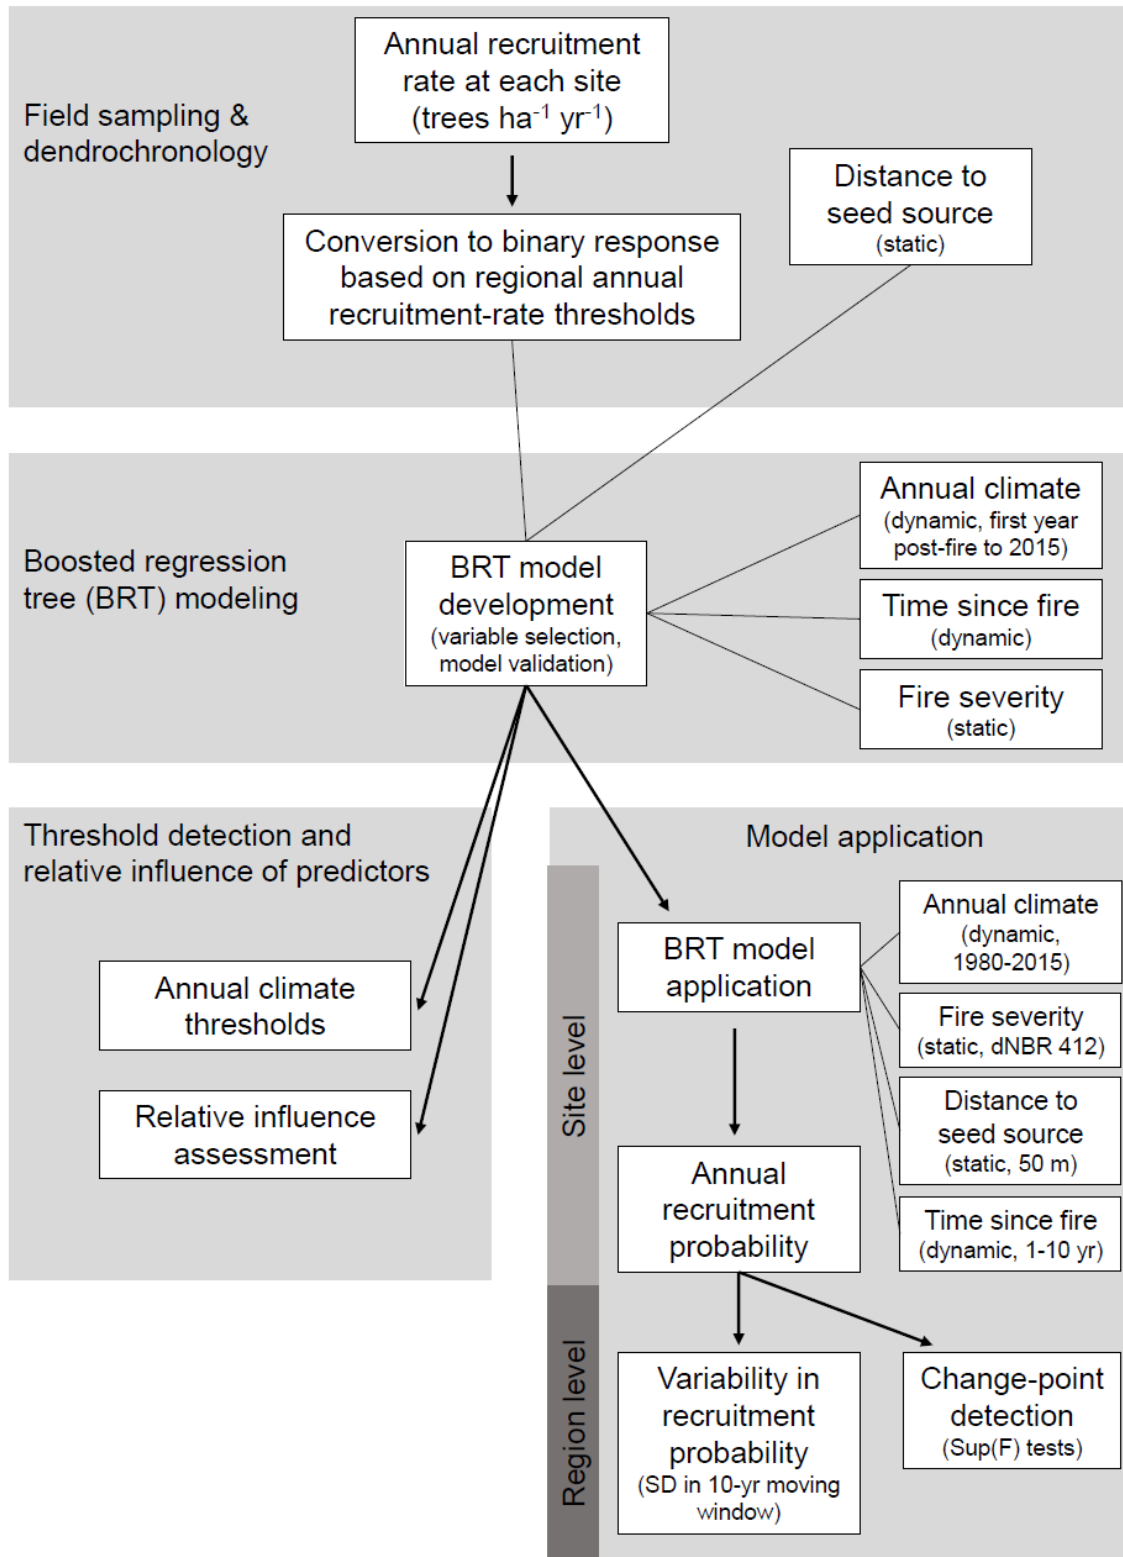

**Figure S1.** Flow diagram of methods. Boxes connected by lines indicate data input into models, while arrows indicate next steps in the analysis.

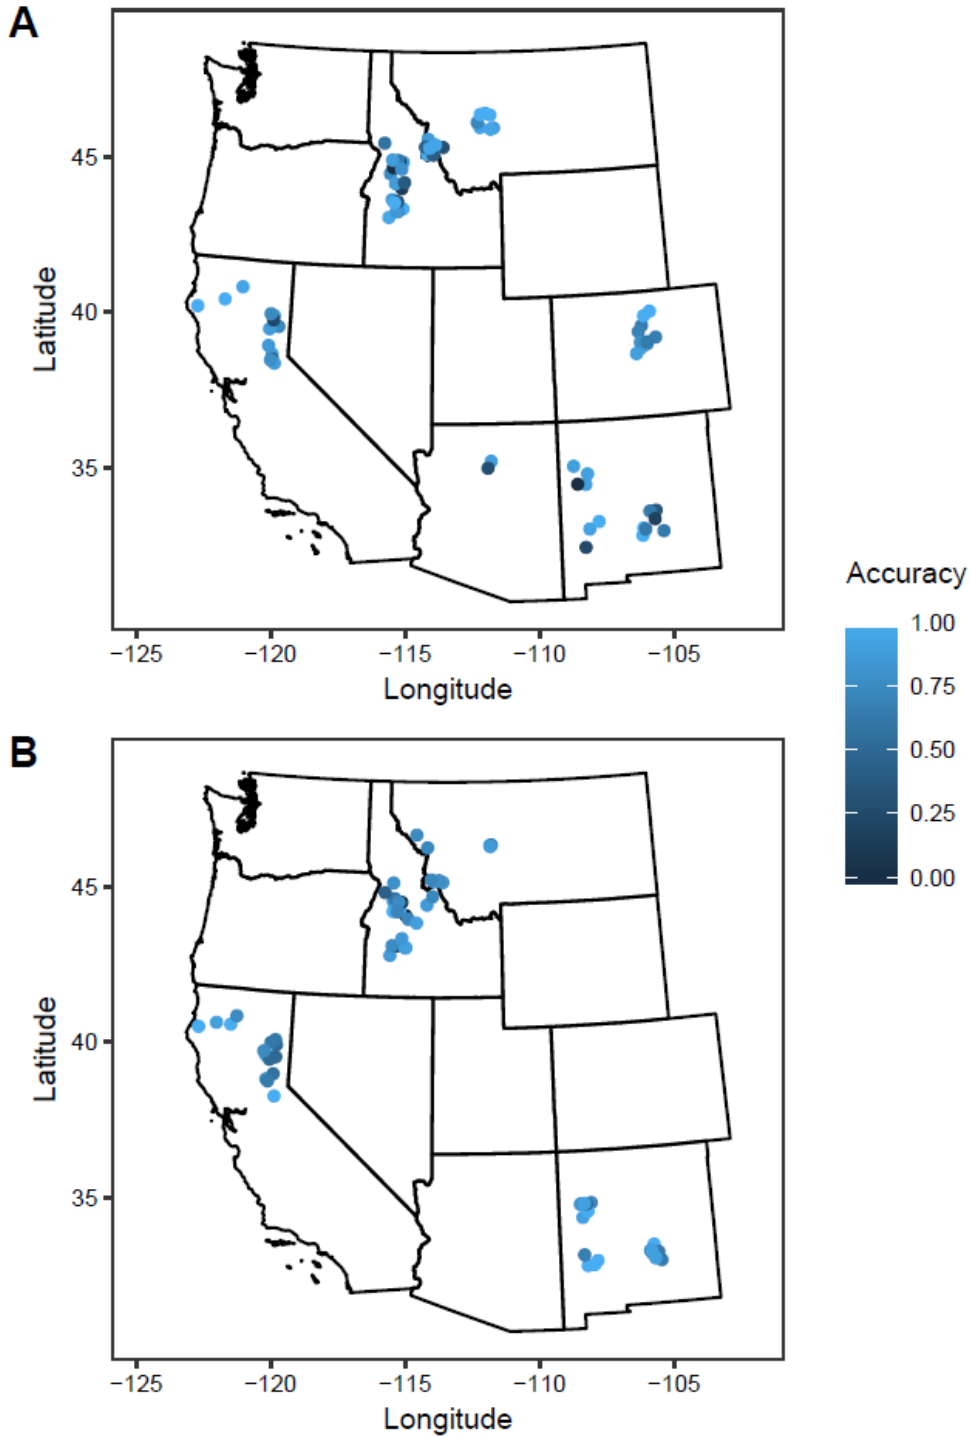

**Figure S2.** Map displaying the accuracy of predictions to each ponderosa pine (A) and Douglas-fir (B) site made from the ponderosa pine and Douglas-fir models fitted while leaving out that site. When calculating accuracy, the threshold for determining success or failure of recruitment from the modeled probabilities was the value that maximized specificity and sensitivity for each site (Youden’s J statistic; ref. 6). Point locations are jittered for clarity.

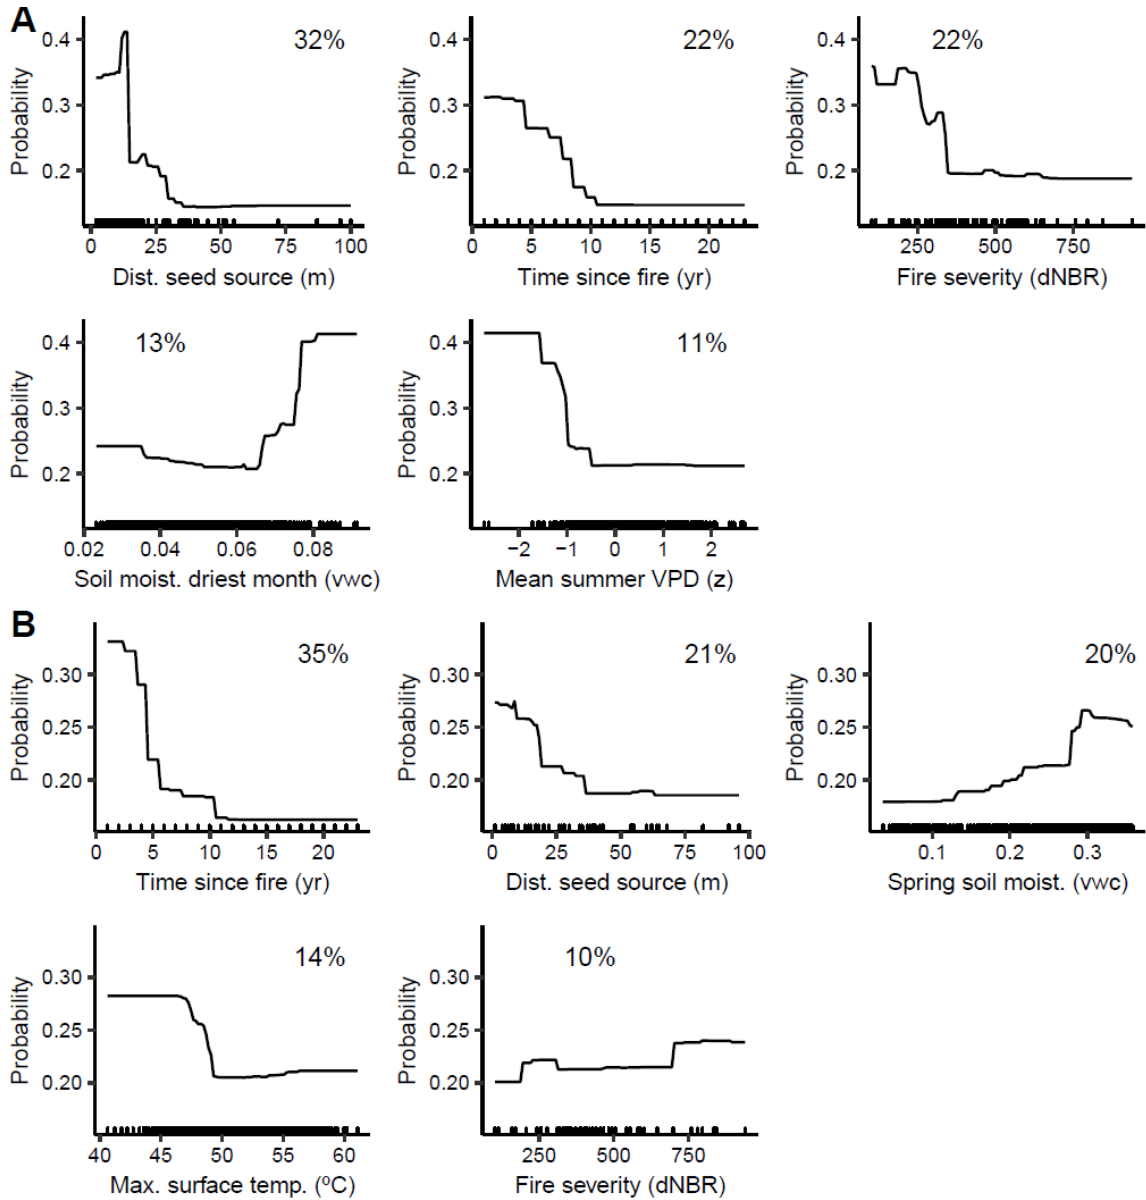

**Figure S3.** Partial dependency plots from final ponderosa pine (A) and Douglas-fir (B) boosted regression tree models showing the marginal effect of each variable on probability of crossing the recruitment threshold after accounting for the average effects of all other variables in the model. Percent values (%) on plots display the relative influence of that predictor. Vertical lines on x-axis (rug plot) show the distribution of observations in the dataset. The recruitment threshold in these models was the 25<sup>th</sup> percentile of recruitment density for years with recruitment for a given species in a given region (Table S1).

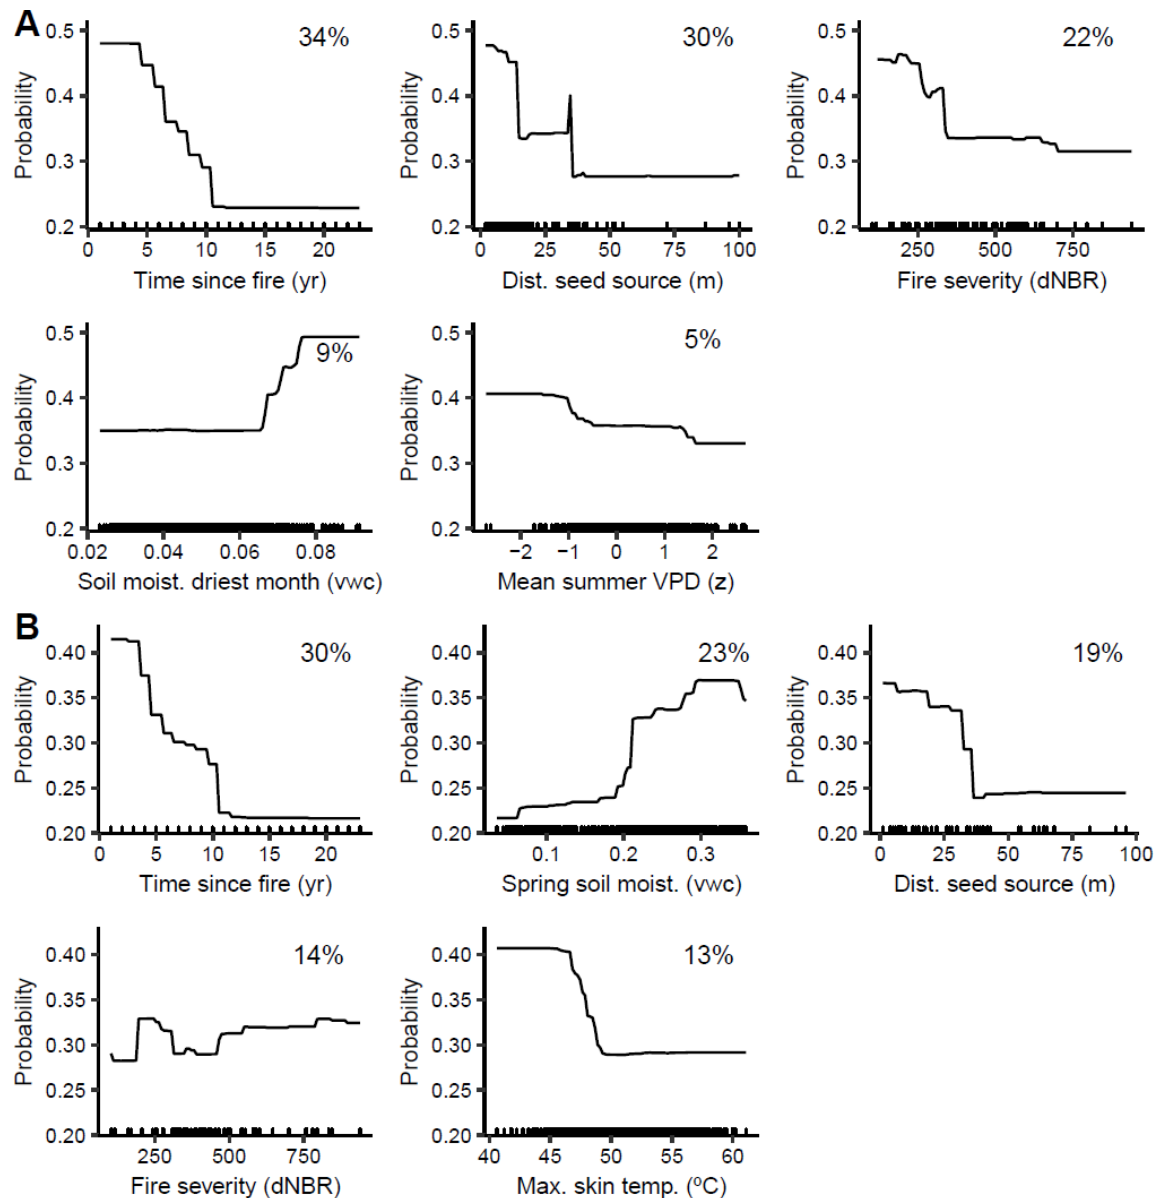

**Figure S4.** Partial dependency plots from final ponderosa pine (A) and Douglas-fir (B) boosted regression tree models showing the marginal effect of each variable on probability of presence of recruitment after accounting for the average effects of all other variables in the model. Percent values (%) on plots display the relative influence of that predictor. Vertical lines on x-axis (rug plot) show the distribution of observations in the dataset. The recruitment threshold in these models was 4 trees/ha (lowest density recorded in any plot in any year) which is equivalent to modeling the presence or absence of at least one seedling in a plot in each year (due to variable plot width).



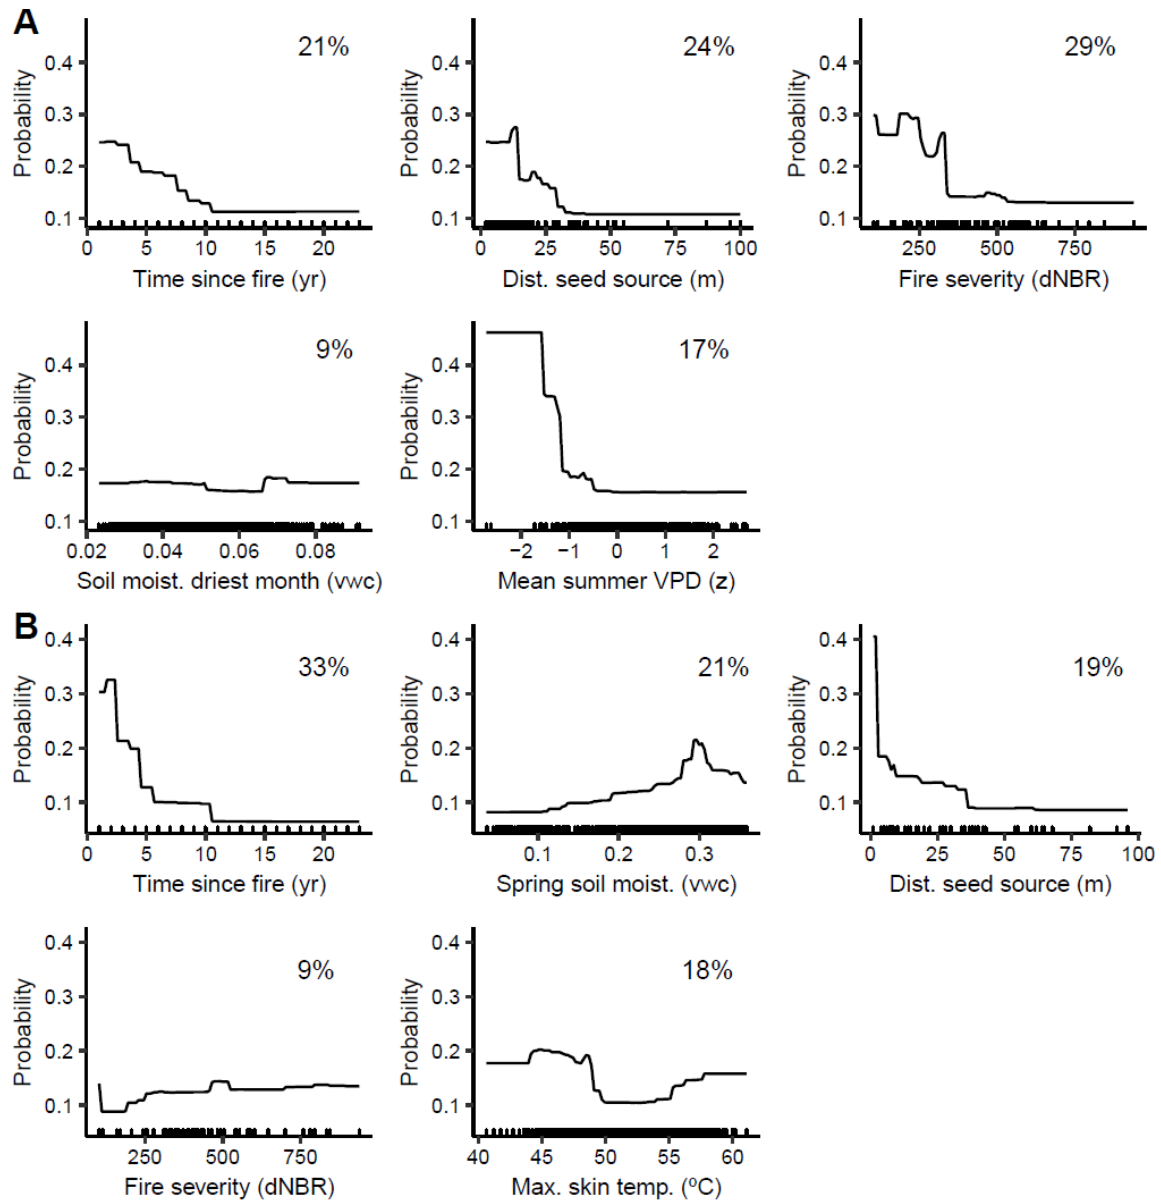

**Figure S5.** Partial dependency plots from final ponderosa pine (A) and Douglas-fir (B) boosted regression tree models showing the marginal effect of each variable on probability of crossing the recruitment threshold after accounting for the average effects of all other variables in the model. Percent values (%) on plots display the relative influence of that predictor. Vertical lines on x-axis (rug plot) show the distribution of observations in the dataset. The recruitment threshold in these models was the 50<sup>th</sup> percentile of recruitment density for years with recruitment for a given species in a given region (Table S1).

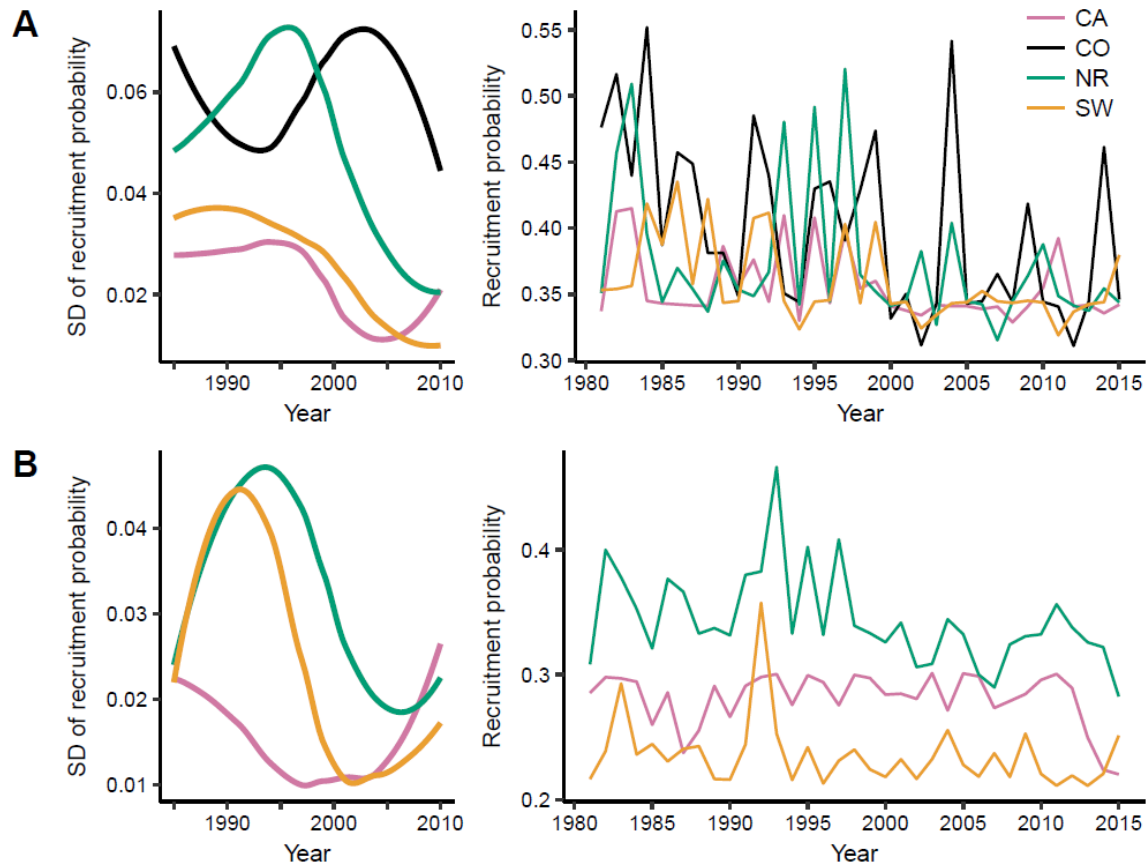

**Figure S6.** Probability of crossing the region-specific recruitment threshold (recruitment probability) and the variability in recruitment probability over time for ponderosa pine (A) and Douglas-fir (B). For predictions of recruitment probability time since fire (1 yr), distance to seed source (50 m), and fire severity (dNBR 412) were held constant. The standard deviation (SD) of recruitment probability was calculated in moving 10 year windows with the year on the x-axis representing the center of each window and summarized with locally weighted polynomial regression smoothing (LOESS). The recruitment threshold in these models was 4 trees/ha (lowest density recorded in any plot in any year) which is equivalent to modeling the presence or absence of at least one seedling in a plot in each year.

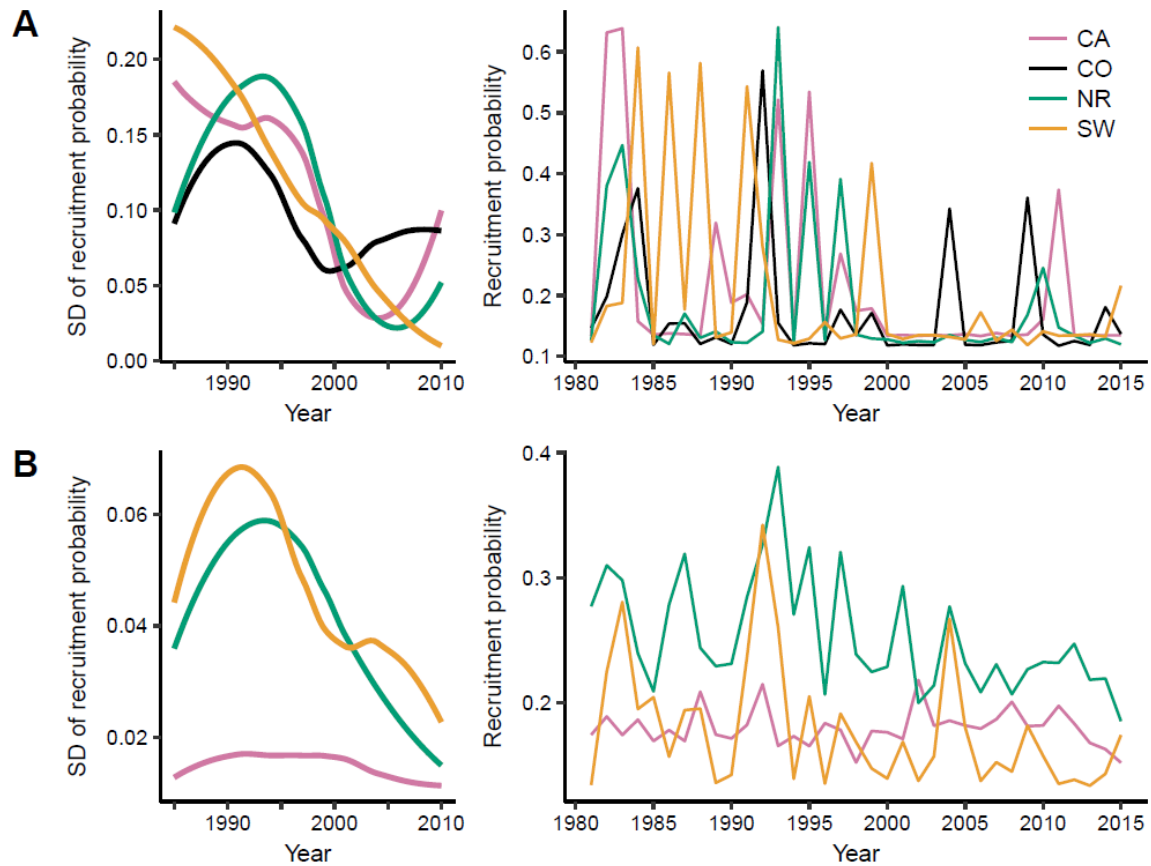

**Figure S7.** Probability of crossing the region-specific recruitment threshold (recruitment probability) and the variability in recruitment probability over time for ponderosa pine (A) and Douglas-fir (B). For predictions of recruitment probability time since fire (1 yr), distance to seed source (50 m), and fire severity (dNBR 412) were held constant. The standard deviation (SD) of recruitment probability was calculated in moving 10 year windows with the year on the x-axis representing the center of each window and summarized with locally weighted polynomial regression smoothing (LOESS). The recruitment threshold in these models was the 50<sup>th</sup> percentile of recruitment density for years with recruitment for a given species in a given region (Table S1).

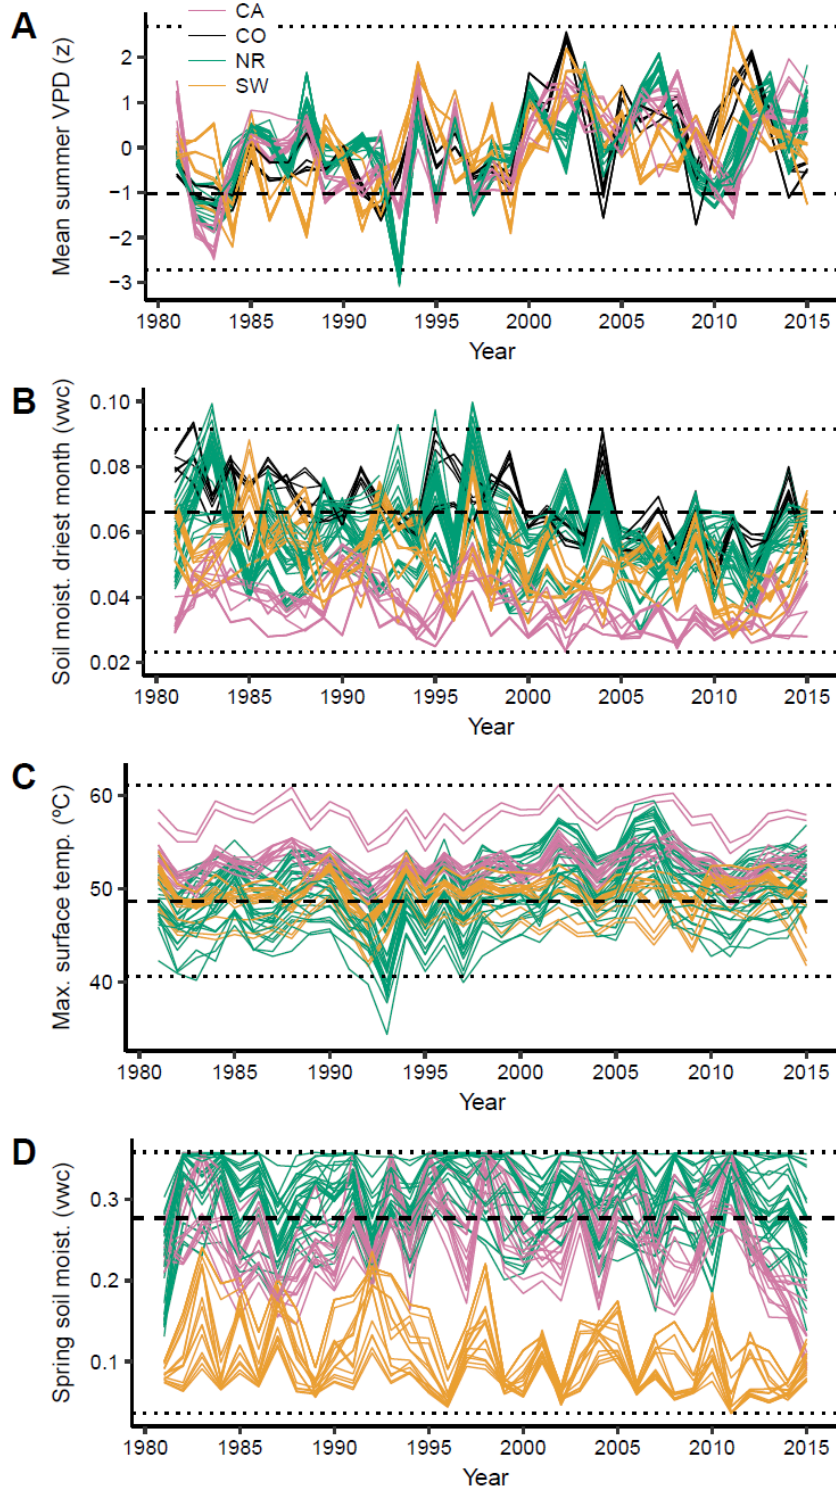

**Figure S8.** Time series of climate variables at each site ( $n=90$ ) that were used to predict changes in annual recruitment probability over time (Figs. 3F & 4F). The dashed line represents the threshold value identified by the BRT models (Figs. 3A, 3C, 4A, & 4C) and the dotted lines represent the maximum and the minimum values used to fit the BRT models (i.e. when we use the BRT models to predict to annual climate conditions outside the dotted lines it is extrapolation).

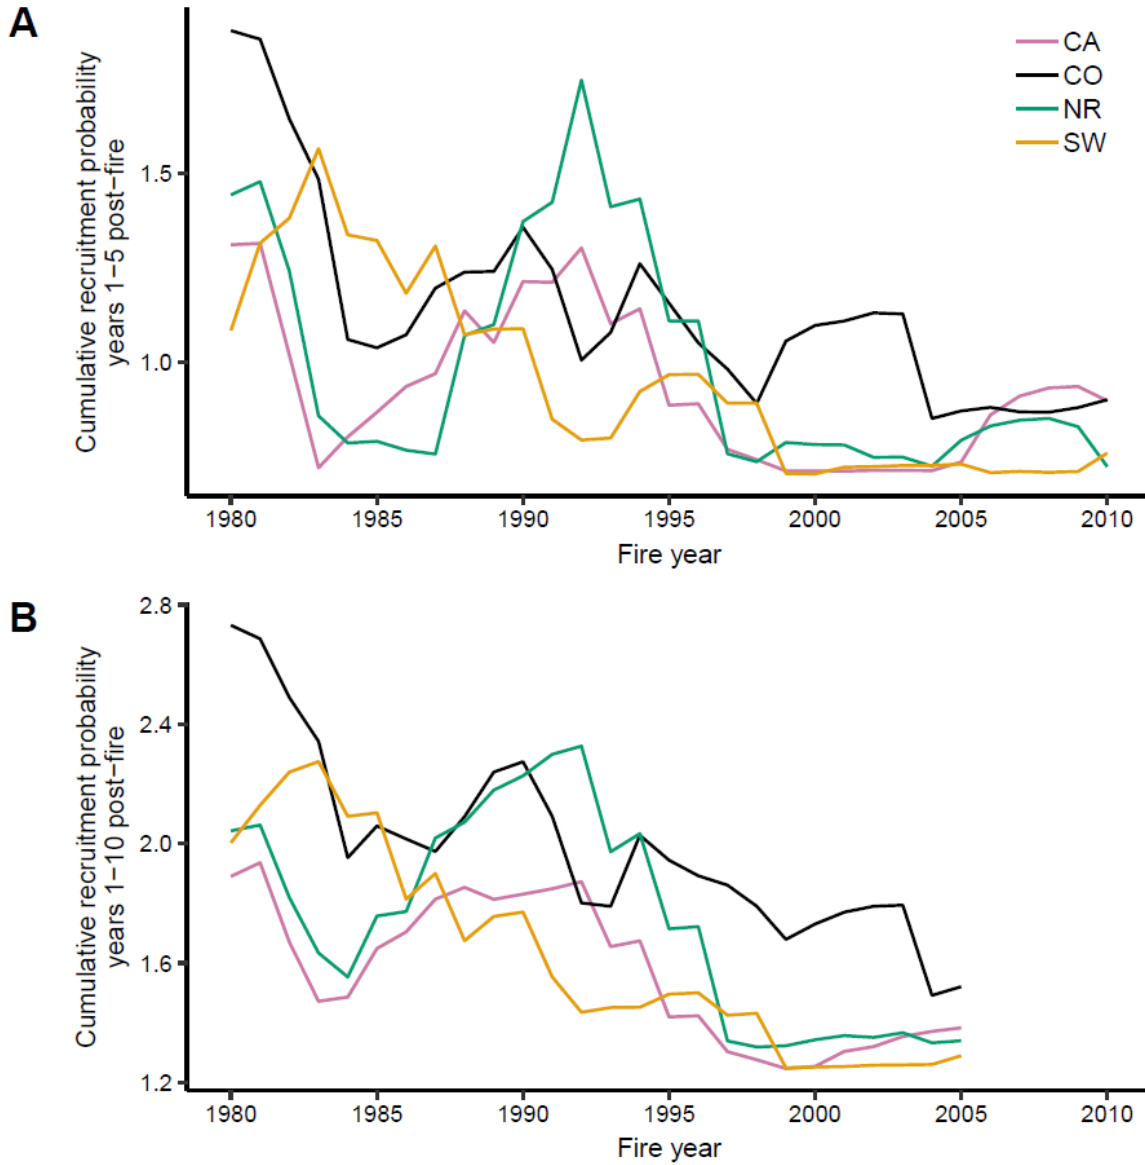

**Figure S9.** Modeled cumulative recruitment probability for ponderosa pine in the first five (A) or ten (B) years following fire, while holding constant distance to seed source (50 m) and fire severity (dNBR 412). The recruitment threshold in these models was the 25<sup>th</sup> percentile of recruitment density for years with recruitment for a given species in a given region (model presented in main text; Table S1).

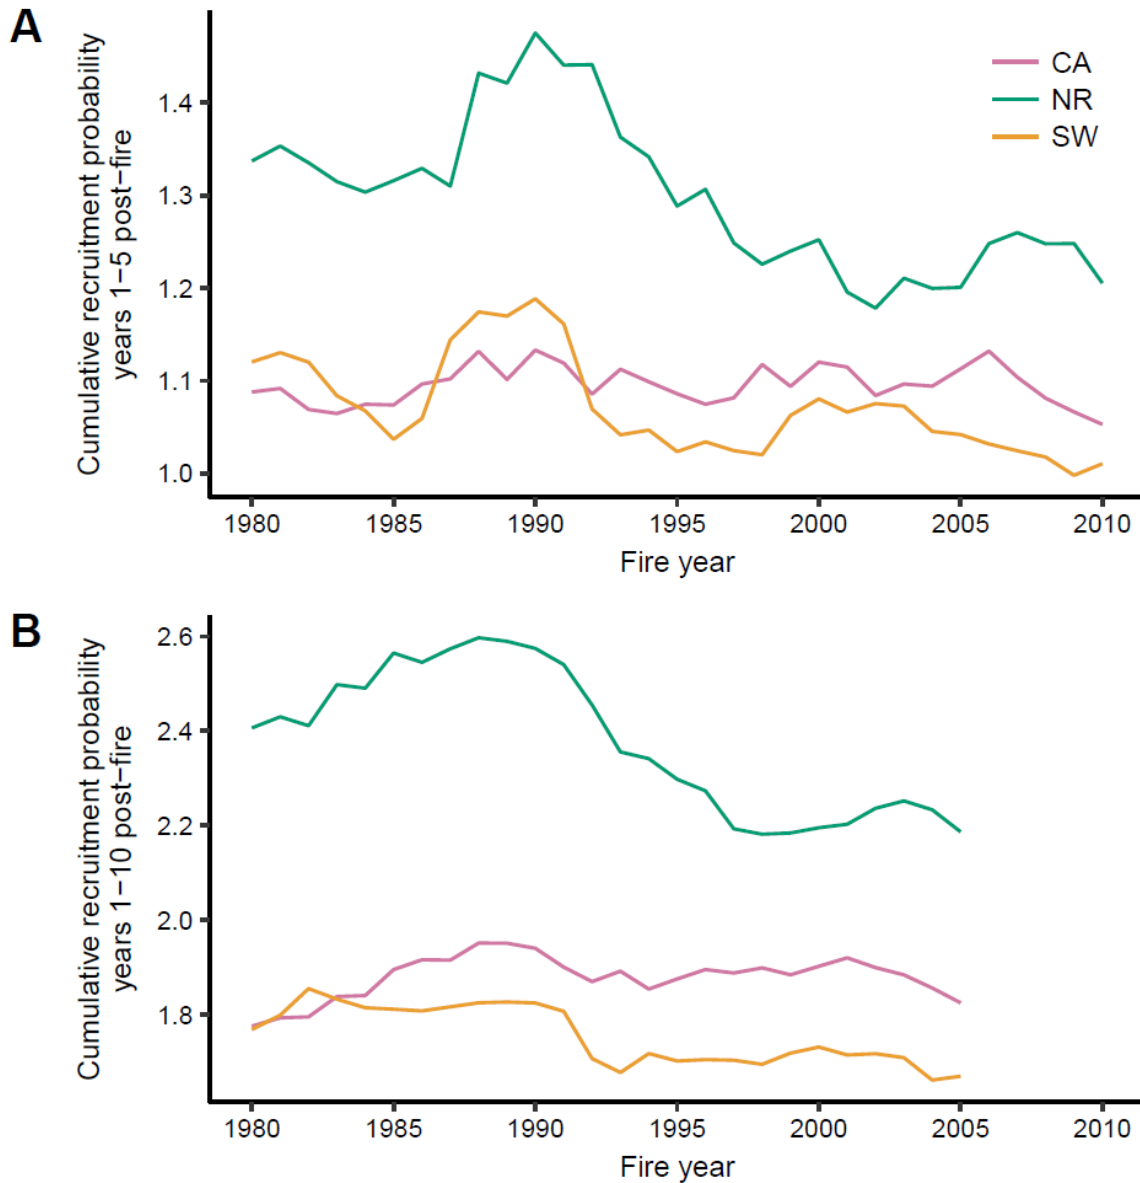

**Figure S10.** Modeled cumulative recruitment probability for Douglas-fir in the first five (A) or ten (B) years following fire, while holding constant distance to seed source (50 m) and fire severity (dNBR 412). The recruitment threshold in these models was the 25<sup>th</sup> percentile of recruitment density for years with recruitment for a given species in a given region (model presented in main text; Table S1).

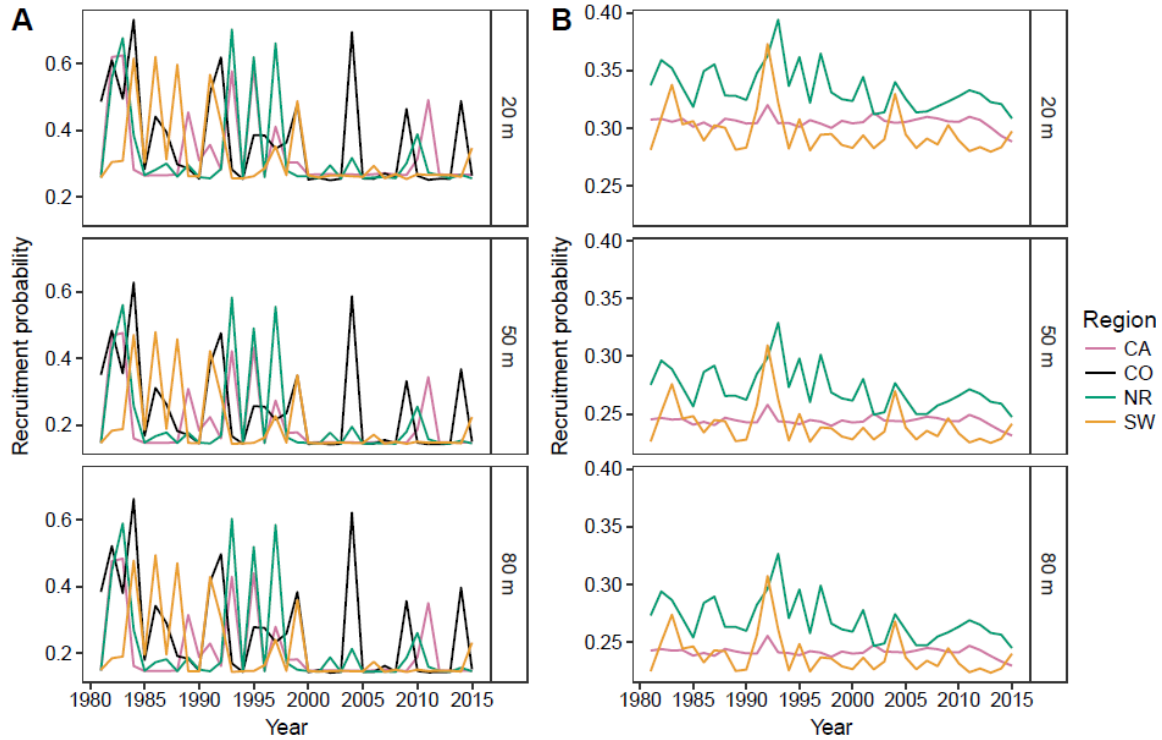

**Figure S11.** Probability of crossing the region-specific recruitment threshold (recruitment probability) for ponderosa pine (A) and Douglas-fir (B). For predictions of recruitment probability time since fire (1 yr) and fire severity (dNBR 412) were held constant. Distance to seed source was set at 20, 50, or 80 m. The recruitment threshold in these models was the 25<sup>th</sup> percentile of recruitment density for years with recruitment for a given species in a given region (Table S1).



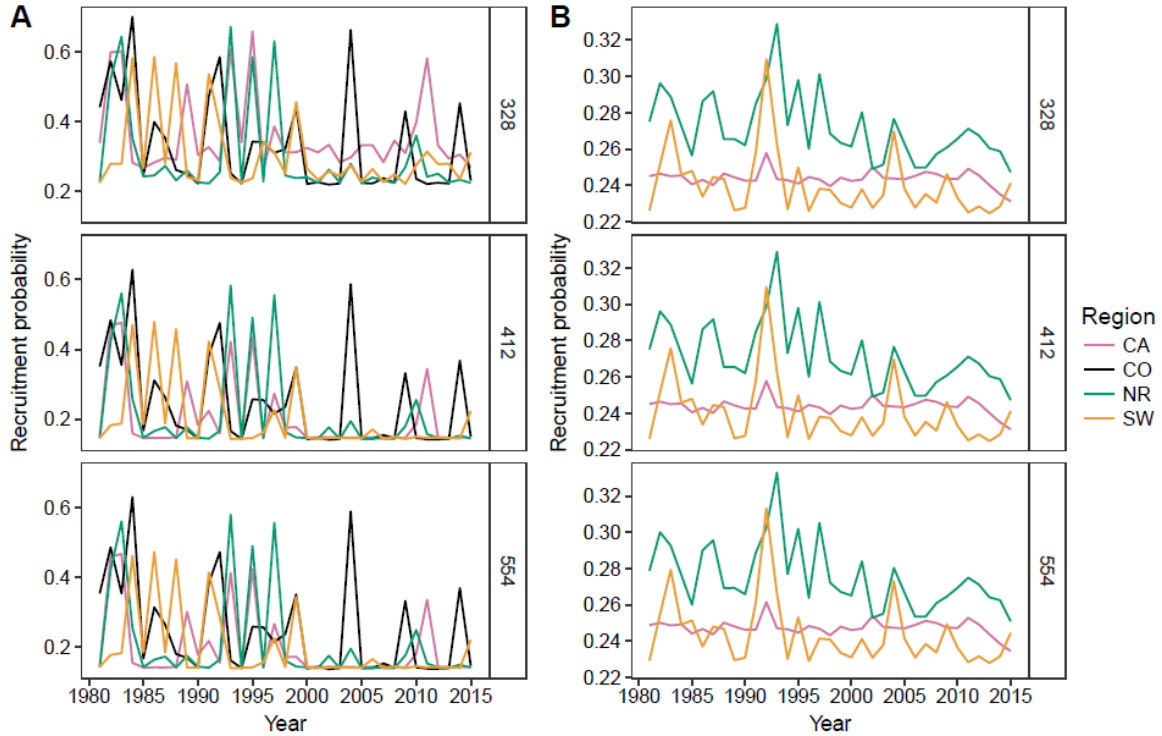

**Figure S12.** Probability of crossing the region-specific recruitment threshold (recruitment probability) for ponderosa pine (A) and Douglas-fir (B). For predictions of recruitment probability time since fire (1 yr) and distance to seed source (50 m) were held constant. Fire severity was set to the dNBR (differenced normalized burn ratio) value that corresponded to the 25<sup>th</sup> (328), 50<sup>th</sup> (412), and 75<sup>th</sup> (554) percentile of the fire severity experienced at the sample sites. The recruitment threshold in these models was the 25<sup>th</sup> percentile of recruitment density for years with recruitment for a given species in a given region (Table S1).



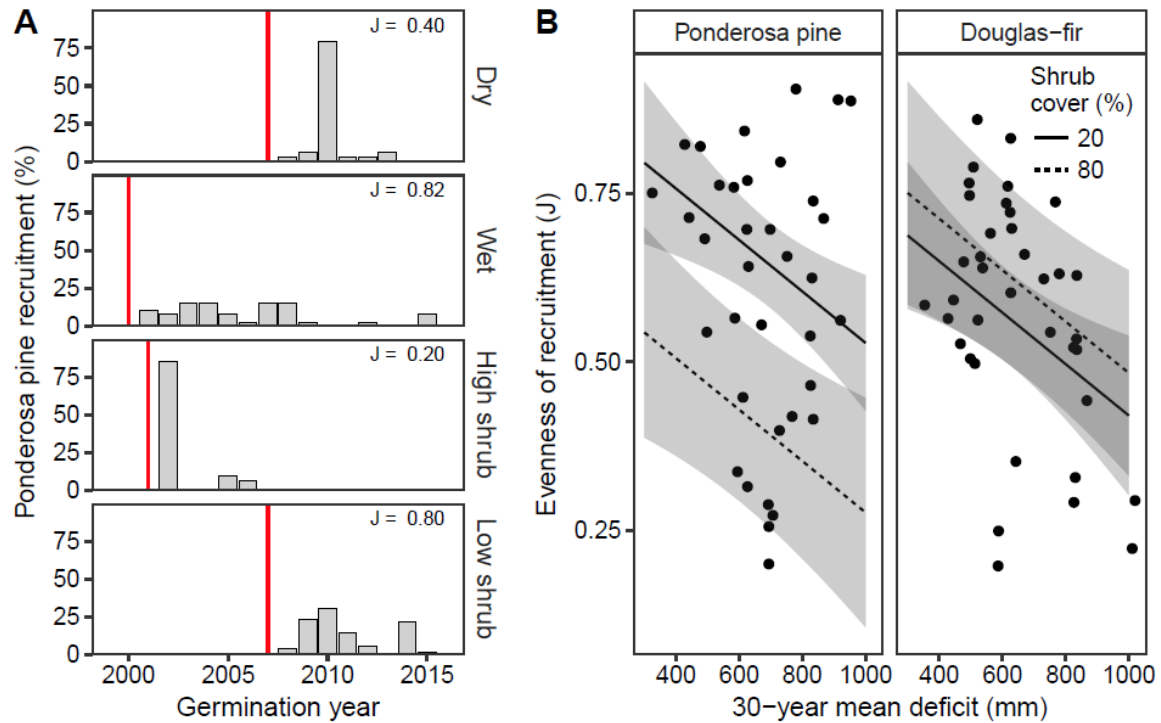

**Figure S13.** Representative age structures from four ponderosa pine sites (A); each panel represents one site. The top two panels show sites with high (728 mm) and low (428 mm) mean annual water deficit (“Dry” and “Wet”, respectively) from the Northern Rockies. The bottom two panels show sites with high (80%) and low (19%) shrub cover from California. Evenness of recruitment scales from 0 (episodic recruitment) to 1 (continuous recruitment). The red vertical line represents the fire year at each site. Age structures for all sites are in Figs. S14-22. Evenness of recruitment ( $J$ ) for all sites in California, Northern Rockies, and the Southwest compared to 30-year mean climatic water deficit (B). Fitted lines for sites with a shrub cover of 20% and 80% are represented by solid and dashed lines respectively. Shaded areas represent 95% confidence intervals. Shrub cover data were not collected in CO and thus CO sites were excluded from this analysis.

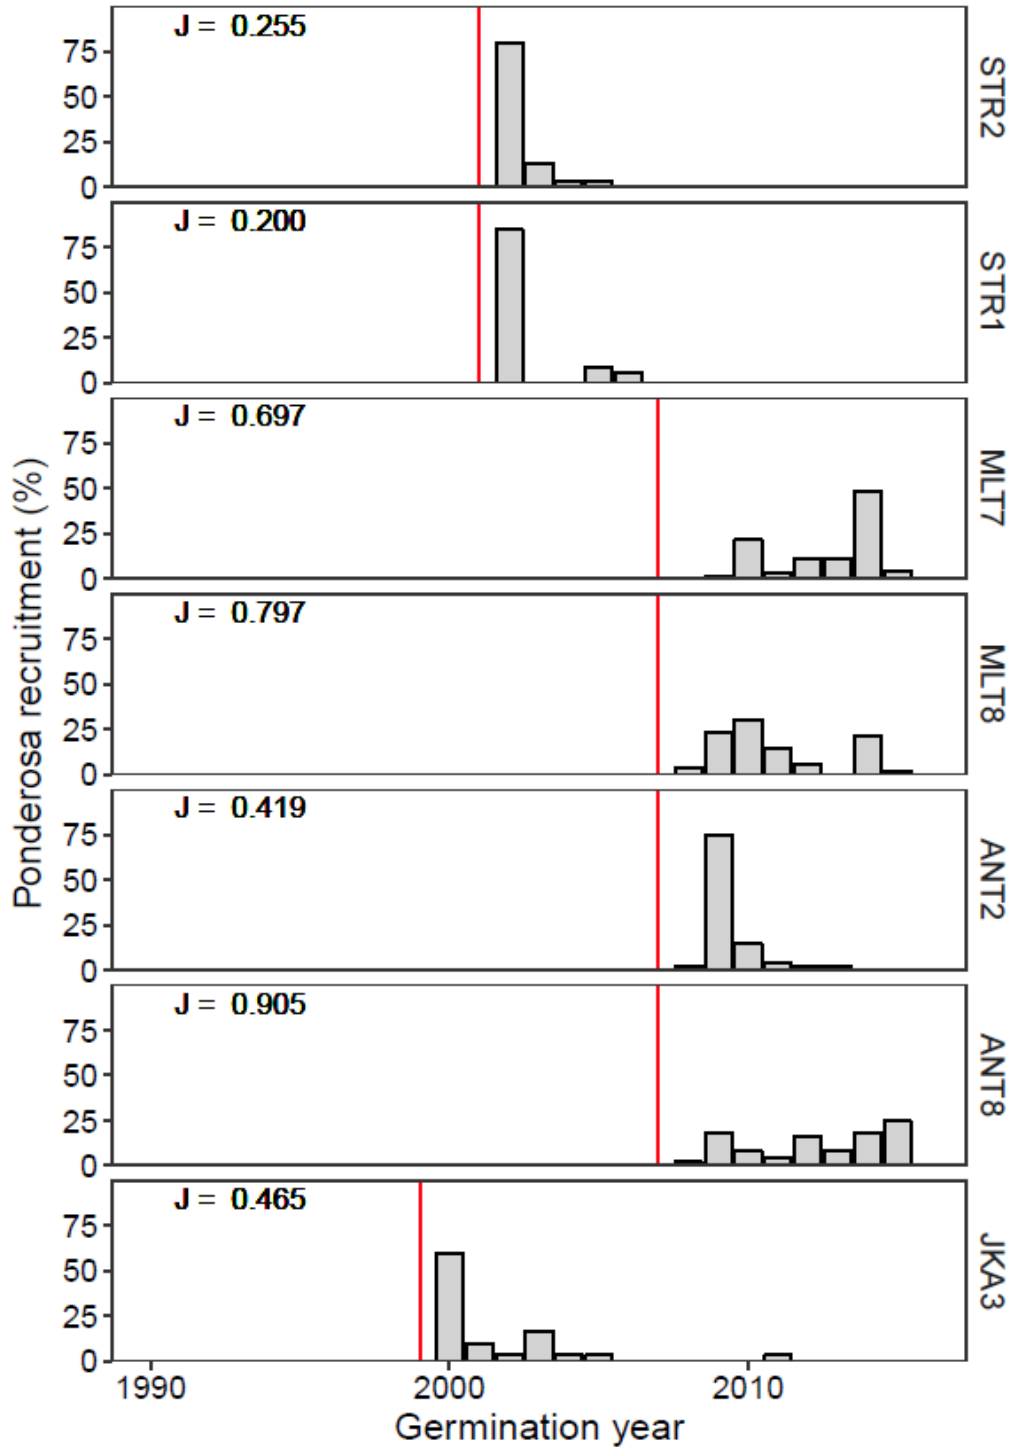

**Figure S14.** Age structures from California (CA) ponderosa pine (*P. ponderosa*) sites showing the percent of total recruitment at each site that occurred in each year. Each box represents one site. Sites are organized from wettest at the top to driest at the bottom based on 30-year (1980-2009) deficit. “J” is evenness of recruitment over time at each site. The red vertical line represents the fire year.

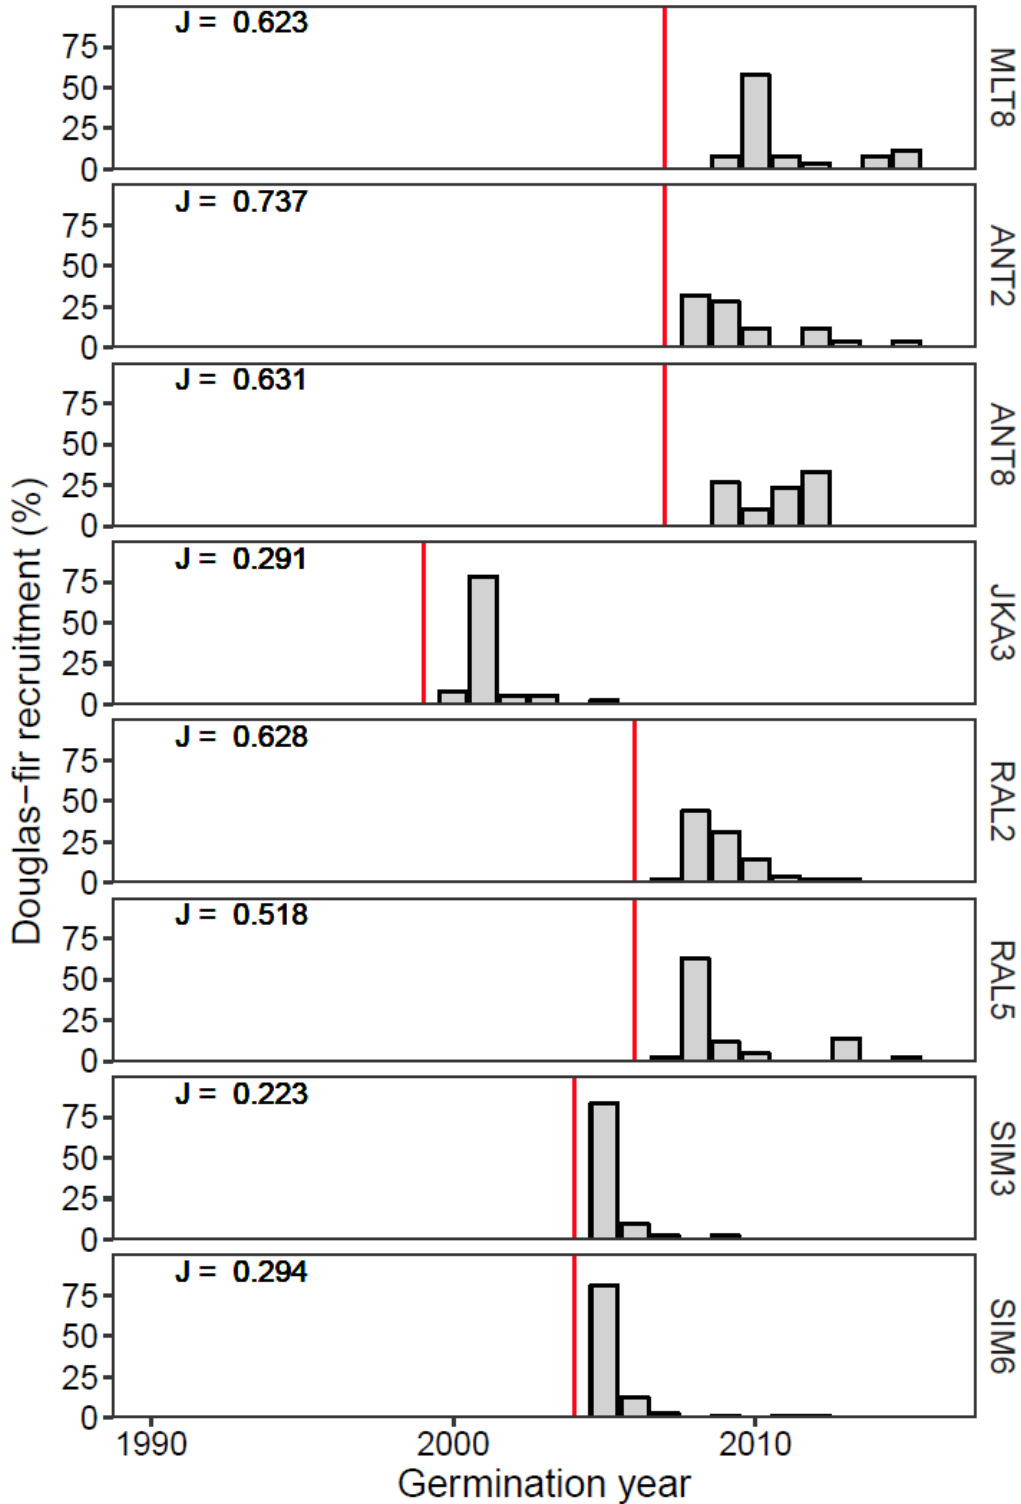

**Figure S15.** Age structures from California (CA) Douglas-fir (*Pseudotsuga menziesii*) sites showing the percent of total recruitment at each site that occurred in each year. Each box represents one site. Sites are organized from wettest at the top to driest at the bottom based on 30-year (1980-2009) deficit. “J” is evenness of recruitment over time at each site. The red vertical line represents the fire year.

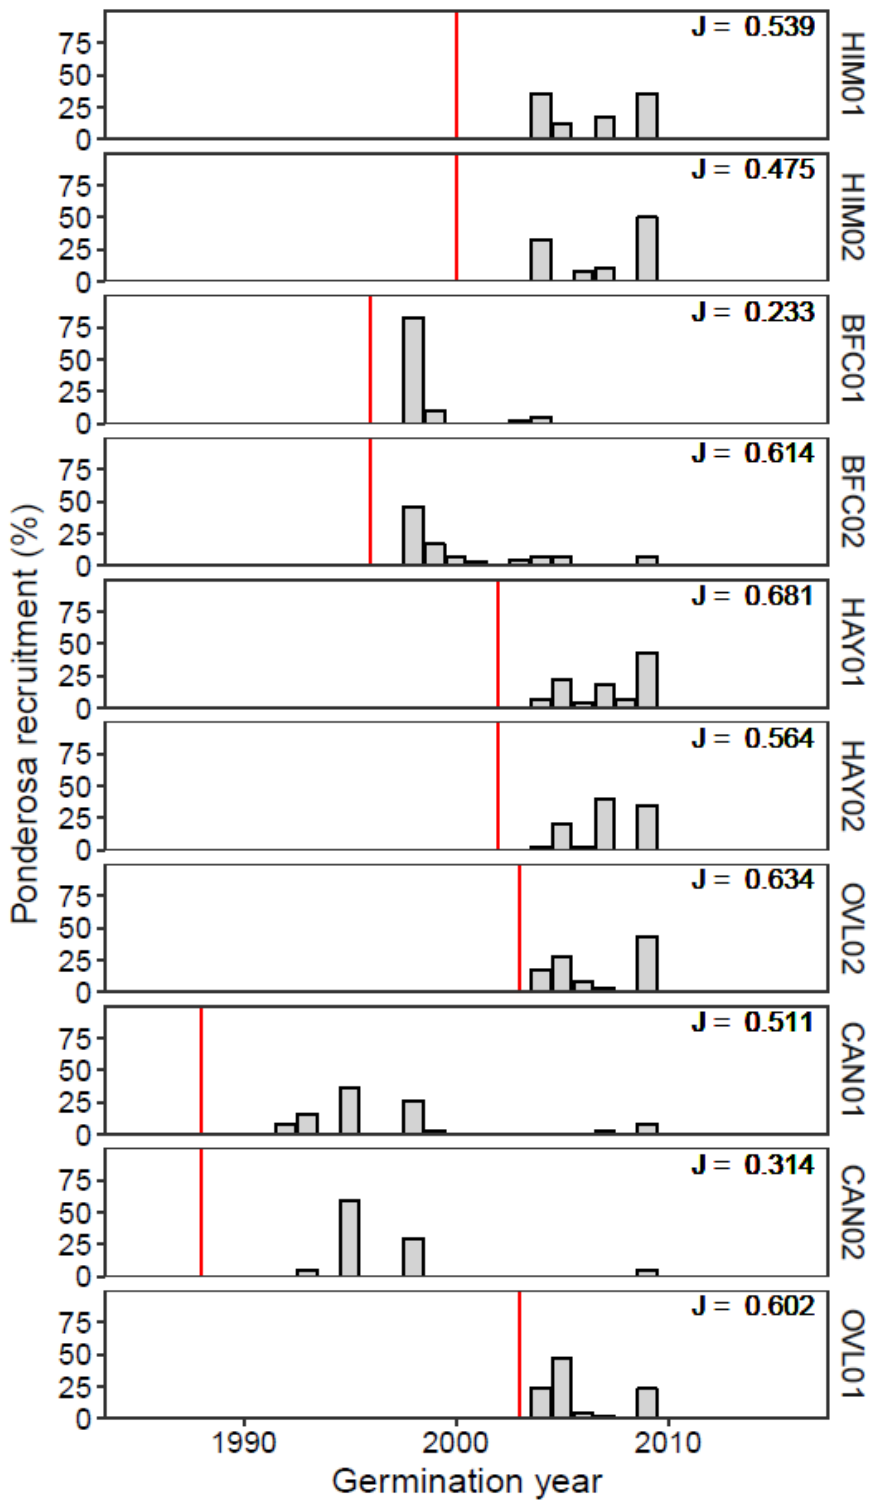

**Figure S16.** Age structures from Colorado (CO) ponderosa pine (*Pinus ponderosa*) sites showing the percent of total recruitment at each site that occurred in each year. Each box represents one site. Sites are organized from wettest at the top to driest at the bottom based on 30-year (1980-2009) deficit. “J” is evenness of recruitment over time at each site. The red vertical line represents the fire year.

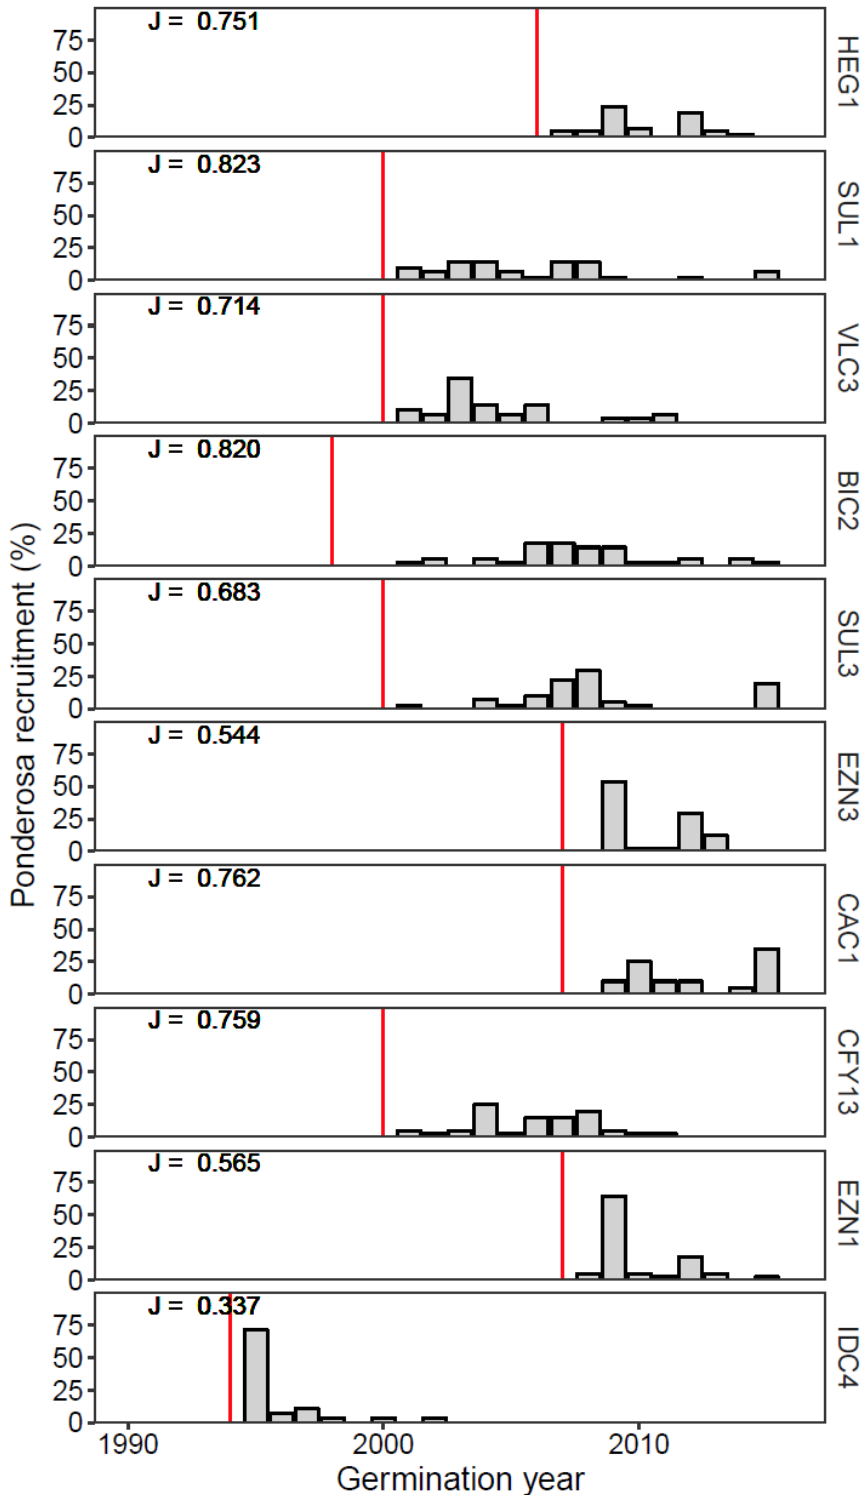

**Figure S17.** Age structures from the 10 wettest Northern Rockies (NR) ponderosa pine (*Pinus ponderosa*) sites showing the percent of total recruitment at each site that occurred in each year. Each box represents one site. Sites are organized from wettest at the top to driest at the bottom based on 30-year (1980-2009) deficit. “J” is evenness of recruitment over time at each site. The red vertical line represents the fire year.

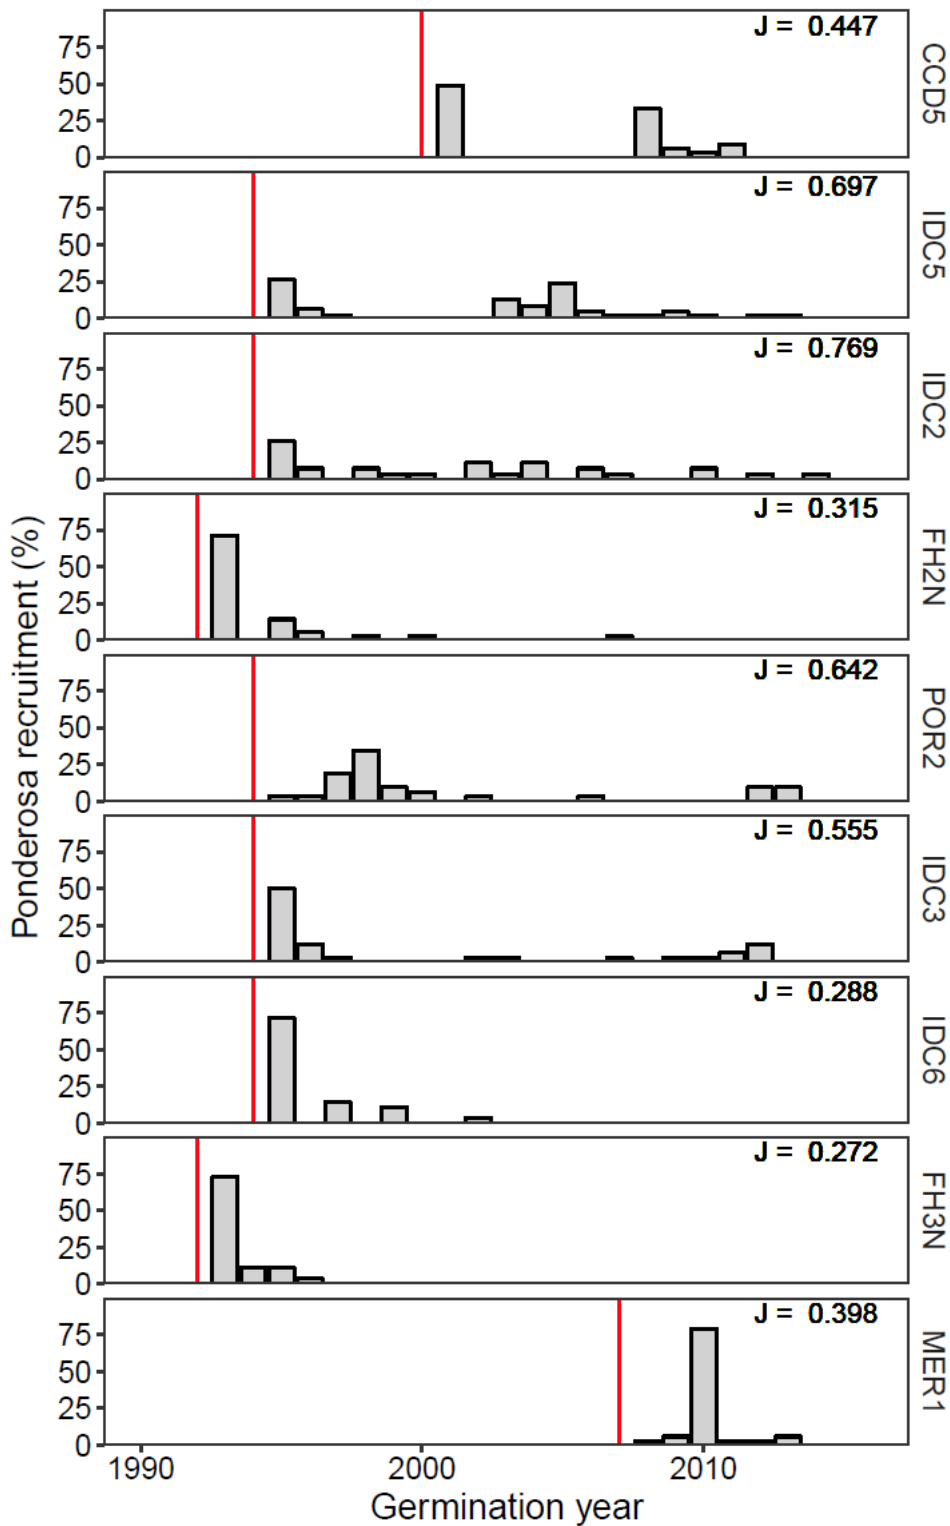

**Figure S18.** Age structures from the 10 driest Northern Rockies (NR) ponderosa pine (*Pinus ponderosa*) sites showing the percent of total recruitment at each site that occurred in each year. Each box represents one site. Sites are organized from wettest at the top to driest at the bottom based on 30-year (1980-2009) deficit. “J” is evenness of recruitment over time at each site. The red vertical line represents the fire year.

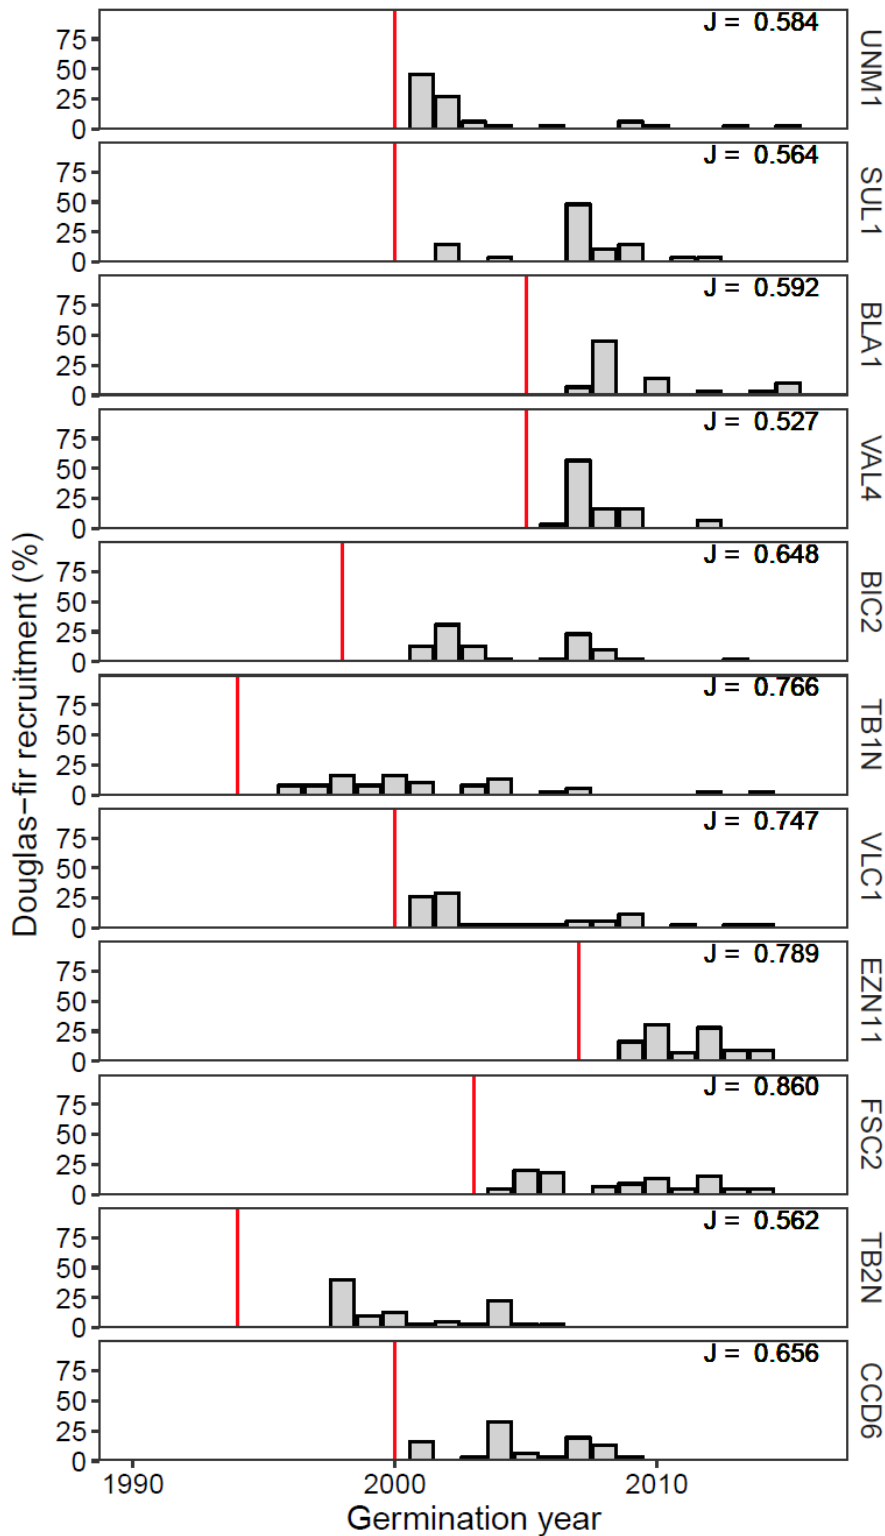

**Figure S19.** Age structures from the 11 wettest Northern Rockies (NR) Douglas-fir (*Pseudotsuga menziesii*) sites showing the percent of total recruitment at each site that occurred in each year. Each box represents one site. Sites are organized from wettest at the top to driest at the bottom based on 30-year (1980-2009) deficit. “J” is evenness of recruitment over time at each site. The red vertical line represents the fire year.

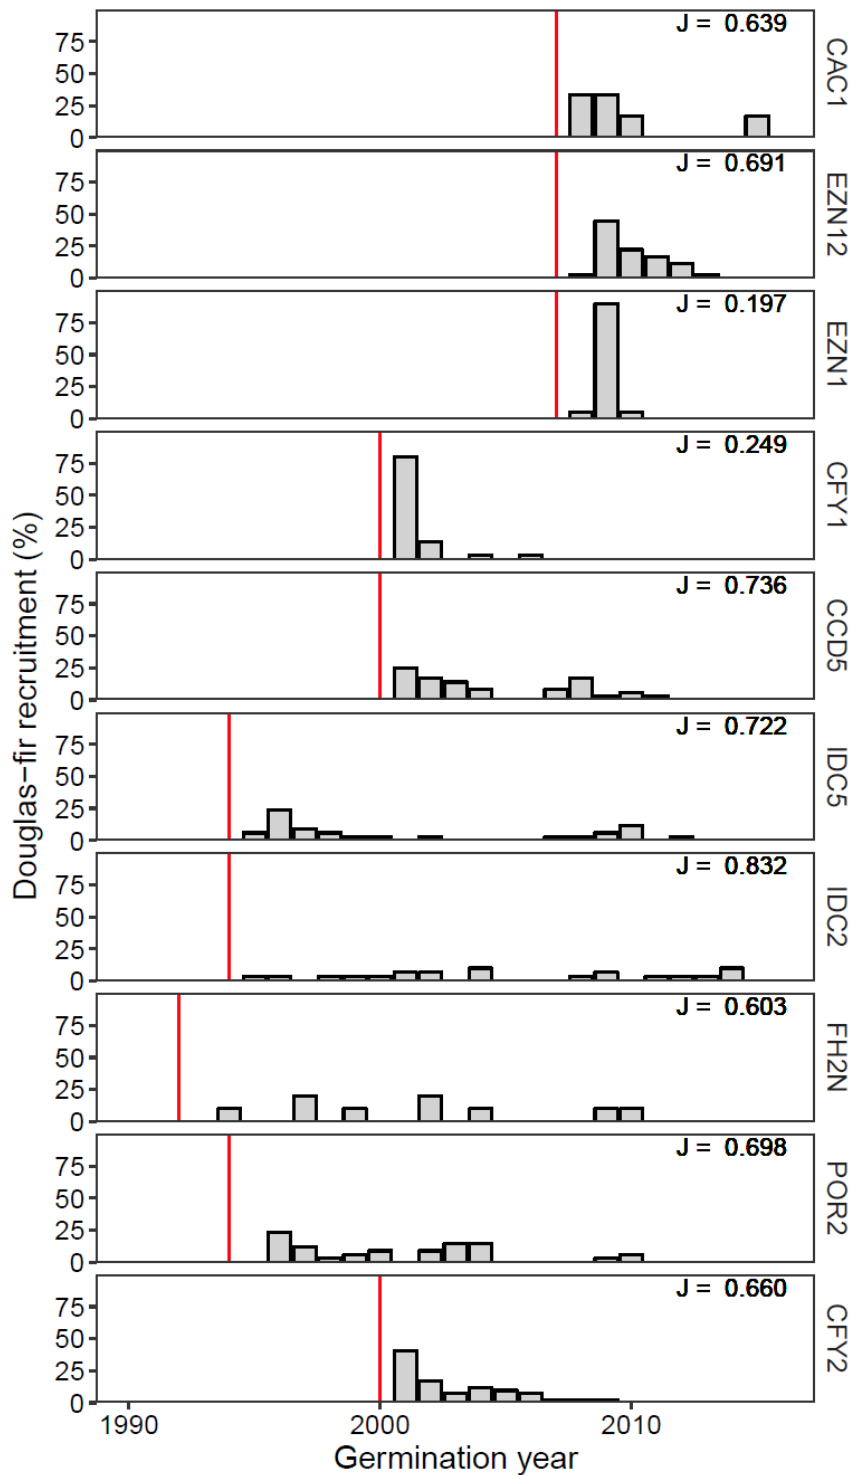

**Figure S20.** Age structures from the 10 driest Northern Rockies (NR) Douglas-fir (*Pseudotsuga menziesii*) sites showing the percent of total recruitment at each site that occurred in each year. Each box represents one site. Sites are organized from wettest at the top to driest at the bottom based on 30-year (1980-2009) deficit. “J” is evenness of recruitment over time at each site. The red vertical line represents the fire year.



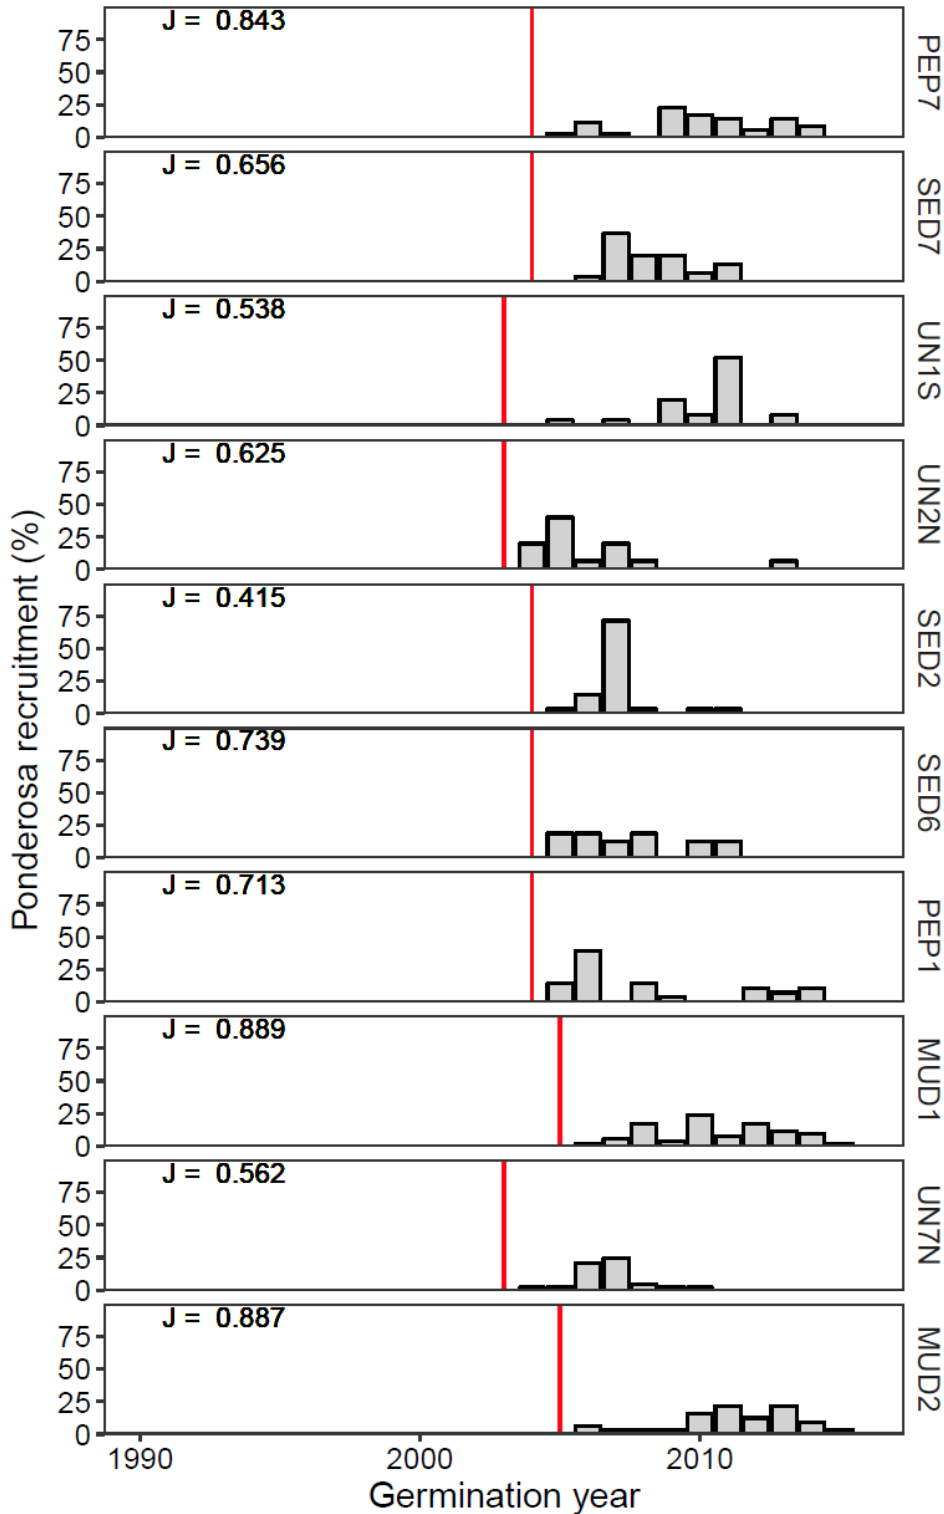

**Figure S21.** Age structures from the Southwest (SW) ponderosa pine (*Pinus ponderosa*) sites showing the percent of total recruitment at each site that occurred in each year. Each box represents one site. Sites are organized from wettest at the top to driest at the bottom based on 30-year (1980–2009) deficit. “J” is evenness of recruitment over time at each site. The red vertical line represents the fire year.

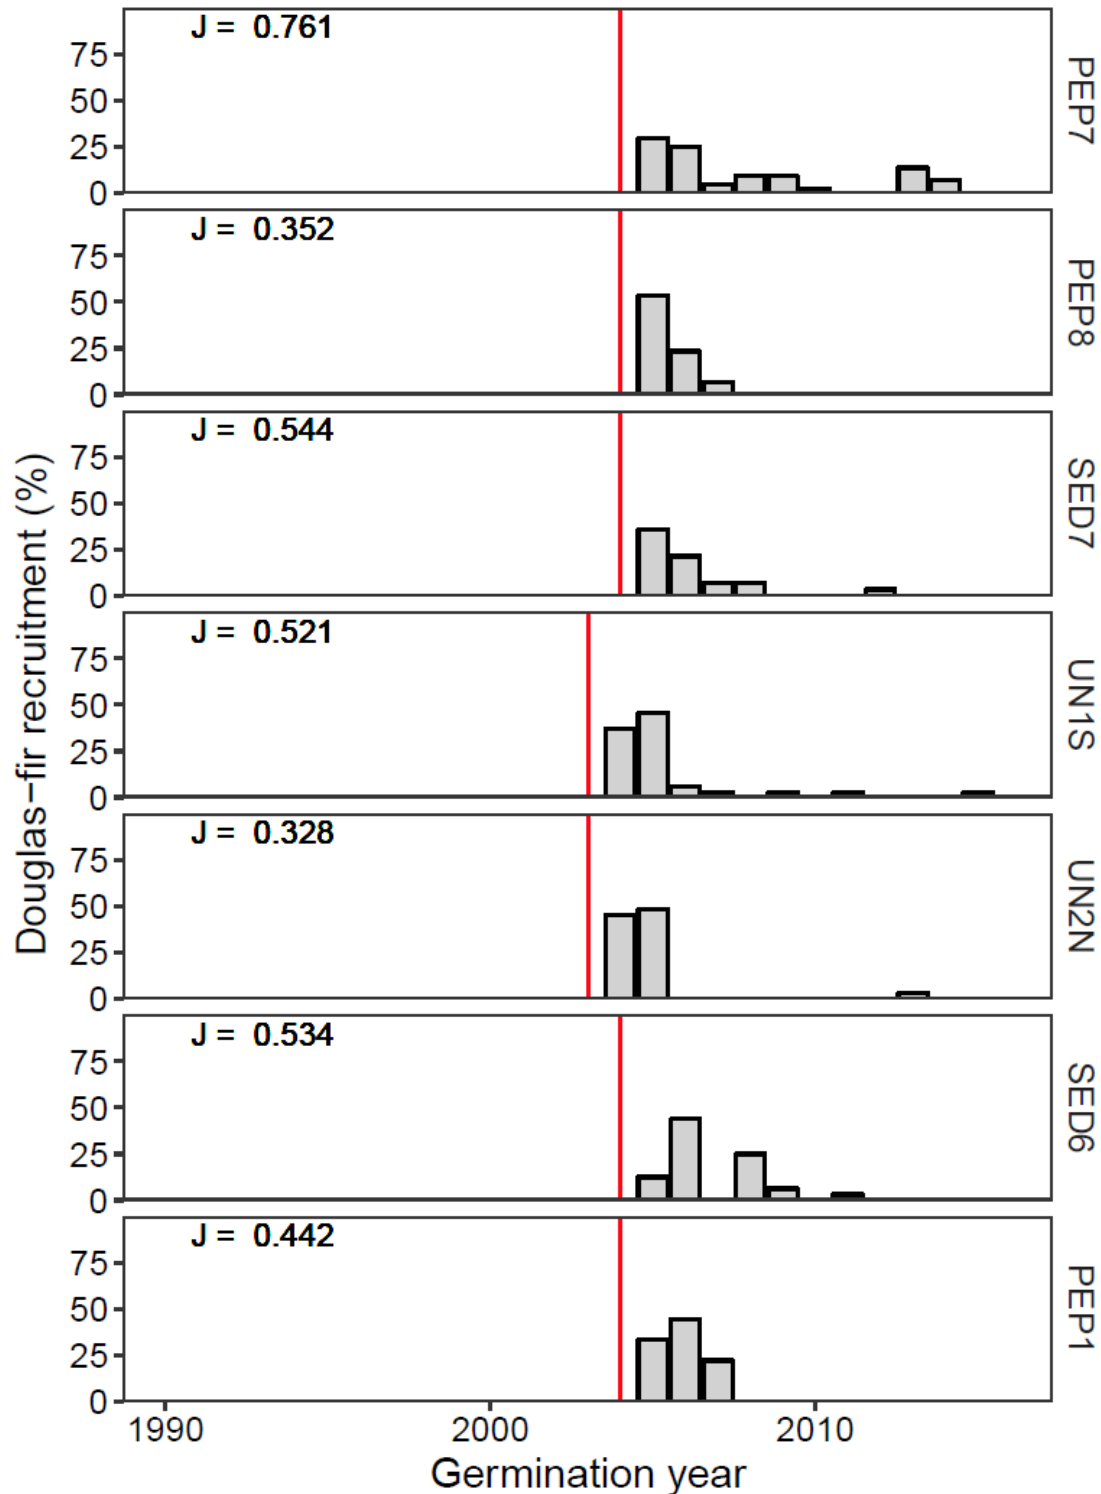

**Figure S22.** Age structures from the Southwest (SW) Douglas-fir (*Pseudotsuga menziesii*) sites showing the percent of total recruitment at each site that occurred in each year. Each box represents one site. Sites are organized from wettest at the top to driest at the bottom based on 30-year (1980-2009) deficit. “J” is evenness of recruitment over time at each site. The red vertical line represents the fire year.

**Table S1.** Number of sites and trees sampled in each region, 30-year (1980-2009) mean annual climatic water deficit for those sites, and annual recruitment rate used as a threshold in each region for modeling a binomial response. Thresholds are the 25<sup>th</sup> or 50<sup>th</sup> percentile of annual recruitment rate for each species in each region for years in which at least one seedling established. Some sites had both species. PIPO is ponderosa pine and PSME is Douglas-fir.

| Region | Species      | Sites     | Juveniles   | Mean annual deficit (mm) | 25 <sup>th</sup> percentile threshold (trees ha <sup>-1</sup> yr <sup>-1</sup> ) | 50 <sup>th</sup> percentile threshold (trees ha <sup>-1</sup> yr <sup>-1</sup> ) |
|--------|--------------|-----------|-------------|--------------------------|----------------------------------------------------------------------------------|----------------------------------------------------------------------------------|
| CA     | PIPO         | 13        | 320         | 741                      | 17                                                                               | 53                                                                               |
|        | PSME         | 16        | 320         | 851                      | 17                                                                               | 42                                                                               |
|        | <b>total</b> | <b>19</b> | <b>640</b>  | <b>800</b>               |                                                                                  |                                                                                  |
| CO     | PIPO         | 10        | 355         | 603                      | 16                                                                               | 80                                                                               |
|        | PSME         | 0         | 0           | -                        |                                                                                  |                                                                                  |
|        | <b>total</b> | <b>10</b> | <b>355</b>  | <b>603</b>               |                                                                                  |                                                                                  |
| NR     | PIPO         | 32        | 658         | 572                      | 42                                                                               | 71                                                                               |
|        | PSME         | 29        | 670         | 538                      | 56                                                                               | 129                                                                              |
|        | <b>total</b> | <b>40</b> | <b>1328</b> | <b>554</b>               |                                                                                  |                                                                                  |
| SW     | PIPO         | 16        | 297         | 835                      | 13                                                                               | 25                                                                               |
|        | PSME         | 18        | 200         | 768                      | 12                                                                               | 24                                                                               |
|        | <b>total</b> | <b>21</b> | <b>497</b>  | <b>807</b>               |                                                                                  |                                                                                  |
| All    | PIPO         | 71        | 1630        | -                        |                                                                                  |                                                                                  |
|        | PSME         | 63        | 1190        | -                        |                                                                                  |                                                                                  |
|        | <b>total</b> | <b>90</b> | <b>2820</b> | -                        |                                                                                  |                                                                                  |

**Table S2.** Region, fire name, fire year, species sampled, and coordinates of all sites.

| Site      | Region | Fire               | Fire year | Species | Latitude | Longitude |
|-----------|--------|--------------------|-----------|---------|----------|-----------|
| ANT2      | CA     | Antelope Complex   | 2007      | both    | 40.1013  | -120.6277 |
| ANT8      | CA     | Antelope Complex   | 2007      | both    | 40.1111  | -120.6293 |
| ANT1N     | CA     | Antelope Complex   | 2007      | PSME    | 40.1110  | -120.6289 |
| ANT1S_ADJ | CA     | Antelope Complex   | 2007      | PSME    | 40.1077  | -120.6322 |
| ANT2S     | CA     | Antelope Complex   | 2007      | PSME    | 40.1020  | -120.6275 |
| JKA3      | CA     | Jackass            | 1999      | both    | 40.8427  | -122.4299 |
| JKA1N     | CA     | Jackass            | 1999      | PIPO    | 40.8466  | -122.4686 |
| JKA3S_ADJ | CA     | Jackass            | 1999      | PSME    | 40.8400  | -122.4318 |
| MLT7      | CA     | Moonlight          | 2007      | both    | 40.1842  | -120.8150 |
| MLT8      | CA     | Moonlight          | 2007      | both    | 40.2089  | -120.8212 |
| MLT4N     | CA     | Moonlight          | 2007      | PIPO    | 40.2007  | -120.8200 |
| MLT4S     | CA     | Moonlight          | 2007      | PSME    | 40.2000  | -120.8196 |
| RAL2      | CA     | Ralston            | 2006      | both    | 39.0284  | -120.6957 |
| RAL5      | CA     | Ralston            | 2006      | both    | 39.0291  | -120.6903 |
| RAL2S     | CA     | Ralston            | 2006      | PIPO    | 39.0269  | -120.6951 |
| SIM6      | CA     | Sims               | 2004      | both    | 40.7121  | -123.5354 |
| SIM3      | CA     | Sims               | 2004      | PSME    | 40.7168  | -123.5424 |
| STR1      | CA     | Star               | 2001      | both    | 39.1185  | -120.5108 |
| STR2      | CA     | Star               | 2001      | both    | 39.1188  | -120.5097 |
| BFC01     | CO     | Buffalo Creek      | 1996      | PIPO    | 39.3753  | -105.2608 |
| BFC02     | CO     | Buffalo Creek      | 1996      | PIPO    | 39.3733  | -105.2722 |
| Can01     | CO     | Canyon             | 1988      | PIPO    | 40.1195  | -105.3255 |
| Can02     | CO     | Canyon             | 1988      | PIPO    | 40.1188  | -105.3256 |
| HAY01     | CO     | Hayman             | 2002      | PIPO    | 39.1824  | -105.1695 |
| HAY02     | CO     | Hayman             | 2002      | PIPO    | 39.1817  | -105.1683 |
| HIM01     | CO     | High Meadows       | 2000      | PIPO    | 39.4097  | -105.3667 |
| HIM02     | CO     | High Meadows       | 2000      | PIPO    | 39.4075  | -105.3511 |
| OVL01     | CO     | Overland           | 2003      | PIPO    | 40.1428  | -105.3167 |
| OVL02     | CO     | Overland           | 2003      | PIPO    | 40.1353  | -105.3228 |
| BIC1      | NR     | Bitterroot Complex | 1998      | both    | 45.9693  | -114.0004 |
| BIC2      | NR     | Bitterroot Complex | 1998      | both    | 45.9696  | -114.0042 |
| BLA1      | NR     | Blackerby          | 2005      | PSME    | 45.8854  | -116.0304 |
| CFY1      | NR     | Canyon Ferry       | 2000      | both    | 46.6904  | -111.7031 |
| CFY1N     | NR     | Canyon Ferry       | 2000      | both    | 46.6907  | -111.7042 |
| CFY2      | NR     | Canyon Ferry       | 2000      | both    | 46.6703  | -111.6883 |
| CFY13     | NR     | Canyon Ferry       | 2000      | PIPO    | 46.6980  | -111.7107 |
| CFY1S     | NR     | Canyon Ferry       | 2000      | PIPO    | 46.6929  | -111.7072 |
| CFY2S     | NR     | Canyon Ferry       | 2000      | PIPO    | 46.6671  | -111.6876 |
| CAC1      | NR     | Cascade Complex    | 2007      | both    | 44.6778  | -115.6571 |
| CCD5      | NR     | Clear Creek Divide | 2000      | both    | 45.3312  | -114.2577 |
| CCD6      | NR     | Clear Creek Divide | 2000      | PSME    | 45.1359  | -114.2121 |

Table S2 continued.

| Site      | Region | Fire               | Fire year | Species | Latitude | Longitude |
|-----------|--------|--------------------|-----------|---------|----------|-----------|
| EAR1      | NR     | Earthquake         | 2001      | PIPO    | 45.8330  | -115.9713 |
| EZN1      | NR     | East Zone          | 2007      | both    | 45.0534  | -115.7493 |
| EZN11     | NR     | East Zone          | 2007      | both    | 45.0817  | -115.7633 |
| EZN12     | NR     | East Zone          | 2007      | both    | 44.9576  | -115.7237 |
| EZN12S    | NR     | East Zone          | 2007      | both    | 44.9544  | -115.7260 |
| EZN2S     | NR     | East Zone          | 2007      | both    | 45.1802  | -115.5795 |
| EZN1S     | NR     | East Zone          | 2007      | PIPO    | 45.0541  | -115.7494 |
| EZN3      | NR     | East Zone          | 2007      | PIPO    | 45.2057  | -115.5847 |
| FSC2      | NR     | Fish Creek         | 2003      | PSME    | 46.9879  | -114.6699 |
| FH2N      | NR     | Foothills          | 1992      | both    | 43.5572  | -115.5510 |
| FH3N      | NR     | Foothills          | 1992      | PIPO    | 43.5775  | -115.6948 |
| FH2S      | NR     | Foothills          | 1992      | PSME    | 43.5585  | -115.5563 |
| HEG1      | NR     | Heaven's Gate      | 2006      | both    | 45.4582  | -116.1210 |
| IDC4      | NR     | Idaho City Complex | 1994      | both    | 43.9315  | -115.5215 |
| IDC6      | NR     | Idaho City Complex | 1994      | both    | 43.8261  | -115.5528 |
| IDC2      | NR     | Idaho City Complex | 1994      | both    | 43.9569  | -115.4657 |
| IDC5      | NR     | Idaho City Complex | 1994      | both    | 43.9450  | -115.4468 |
| IDC3      | NR     | Idaho City Complex | 1994      | PIPO    | 43.9025  | -115.4514 |
| MER1      | NR     | Meriwether         | 2007      | PIPO    | 46.8208  | -111.9274 |
| POR2      | NR     | Porphyry South     | 1994      | both    | 45.1815  | -115.5706 |
| SUL1      | NR     | Sula Complex       | 2000      | both    | 45.9037  | -114.1695 |
| SUL3      | NR     | Sula Complex       | 2000      | PIPO    | 45.9050  | -114.1665 |
| TB1N      | NR     | Thunderbolt        | 1994      | PSME    | 44.7939  | -115.5489 |
| TB2N      | NR     | Thunderbolt        | 1994      | PSME    | 44.7925  | -115.5426 |
| UNM1      | NR     | Upper Ninemile     | 2000      | PSME    | 47.2191  | -114.5760 |
| VLC1      | NR     | Valley Complex     | 2000      | both    | 45.9719  | -114.0224 |
| VLC3      | NR     | Valley Complex     | 2000      | PIPO    | 46.0043  | -114.0303 |
| VAL4      | NR     | Valley Road        | 2005      | PSME    | 44.0414  | -114.7574 |
| MUD1      | SW     | Mudersbach         | 2005      | PIPO    | 35.8708  | -111.9316 |
| MUD2      | SW     | Mudersbach         | 2005      | PIPO    | 35.8561  | -111.9092 |
| PEP1      | SW     | Peppin             | 2004      | both    | 33.6192  | -105.4752 |
| PEP2bN    | SW     | Peppin             | 2004      | both    | 33.6367  | -105.5082 |
| PEP3S     | SW     | Peppin             | 2004      | both    | 33.6256  | -105.4669 |
| PEP5N     | SW     | Peppin             | 2004      | both    | 33.6146  | -105.4759 |
| PEP7      | SW     | Peppin             | 2004      | both    | 33.6130  | -105.4413 |
| PEP8      | SW     | Peppin             | 2004      | both    | 33.6150  | -105.4494 |
| PEP2S_ADJ | SW     | Peppin             | 2004      | PIPO    | 33.6335  | -105.5161 |
| PEP5S     | SW     | Peppin             | 2004      | PSME    | 33.6197  | -105.4763 |
| SED2      | SW     | Sedgewick          | 2004      | both    | 35.1987  | -108.1008 |
| SED6      | SW     | Sedgewick          | 2004      | both    | 35.1985  | -108.1011 |

Table S2 continued.

| Site  | Region | Fire      | Fire year | Species | Latitude | Longitude |
|-------|--------|-----------|-----------|---------|----------|-----------|
| SED6S | SW     | Sedgewick | 2004      | both    | 35.1991  | -108.1014 |
| SED7  | SW     | Sedgewick | 2004      | both    | 35.1725  | -108.0896 |
| SED2S | SW     | Sedgewick | 2004      | PSME    | 35.1991  | -108.1008 |
| SED3N | SW     | Sedgewick | 2004      | PSME    | 35.1764  | -108.0816 |
| SED3S | SW     | Sedgewick | 2004      | PSME    | 35.1714  | -108.0827 |
| UN1S  | SW     | Unnamed   | 2003      | both    | 33.3603  | -107.8339 |
| UN2N  | SW     | Unnamed   | 2003      | both    | 33.3592  | -107.8283 |
| UN7N  | SW     | Unnamed   | 2003      | both    | 33.4012  | -107.7994 |
| UN6N  | SW     | Unnamed   | 2003      | PSME    | 33.4014  | -107.7997 |

**Table S3.** Correlation between annual climate variables used in the final BRT models. The ponderosa pine model included mean summer vapor pressure deficit (VPD) and mean soil moisture of the driest month as predictors. The Douglas-fir model included maximum (max) surface temperature and mean spring (March – May) soil moisture.

| Species        | Variable 1                 | Variable 2                 | Correlation |
|----------------|----------------------------|----------------------------|-------------|
| Ponderosa pine | Summer VPD                 | Soil moisture driest month | -0.26       |
| Ponderosa pine | Summer VPD                 | Max surface temperature    | 0.31        |
| Ponderosa pine | Summer VPD                 | Spring soil moisture       | -0.13       |
| Ponderosa pine | Soil moisture driest month | Max surface temperature    | -0.38       |
| Ponderosa pine | Soil moisture driest month | Spring soil moisture       | 0.02        |
| Ponderosa pine | Max surface temperature    | Spring soil moisture       | 0.26        |
| Douglas-fir    | Summer VPD                 | Soil moisture driest month | -0.22       |
| Douglas-fir    | Summer VPD                 | Max surface temperature    | 0.30        |
| Douglas-fir    | Summer VPD                 | Spring soil moisture       | -0.12       |
| Douglas-fir    | Soil moisture driest month | Max surface temperature    | -0.45       |
| Douglas-fir    | Soil moisture driest month | Spring soil moisture       | 0.17        |
| Douglas-fir    | Max surface temperature    | Spring soil moisture       | 0.07        |

**Table S4.** Mean accuracy (proportion of years with correct prediction), AUC, and H measure (coherent AUC alternative; ref. 9) by region from spatially independent cross-validation by site for the ponderosa pine (PIPO) and Douglas-fir (PSME) BRT models. When calculating accuracy, the threshold for determining success or failure of recruitment from the modeled probabilities was the value that maximized specificity and sensitivity for each site (Youden’s J statistic; ref. 6). Based on ANOVA and post-hoc Tukey’s tests, accuracy, AUC, and H measure were not statistically different between regions ( $P>0.05$ ). Sites that had all 0’s or all 1’s could not be included in AUC statistics. For PIPO this was 24 of 71 sites and for PSME this was 27 of 63 sites. These sites had a mean accuracy of 0.70 and 0.65 (PIPO and PSME respectively).

|      |           | CA   | CO   | NR   | SW   |
|------|-----------|------|------|------|------|
| PIPO | Accuracy  | 0.77 | 0.79 | 0.70 | 0.66 |
|      | AUC       | 0.79 | 0.79 | 0.79 | 0.78 |
|      | H measure | 0.57 | 0.55 | 0.57 | 0.61 |
| PSME | Accuracy  | 0.75 | NA   | 0.73 | 0.85 |
|      | AUC       | 0.89 | NA   | 0.77 | 0.90 |
|      | H measure | 0.78 | NA   | 0.53 | 0.79 |



**Table S5.** Transition years in modeled recruitment probability timeseries as identified by a change-point detection algorithm (sup(F) tests). Time series included annual recruitment probability in the first year following fire (1 yr post-fire), and cumulative recruitment probability in the first five or 10 years following fire (5 or 10 yr post-fire, respectively). All transitions were associated with a decline in recruitment probability in the more recent time period except for PSME 10 yr post-fire in CA where recruitment probability increased following 1984. PIPO is ponderosa pine and PSME is Douglas-fir.

|                      | CA    |          | CO    |          | NR    |          | SW    |          |
|----------------------|-------|----------|-------|----------|-------|----------|-------|----------|
|                      | shift | <i>P</i> | shift | <i>P</i> | shift | <i>P</i> | shift | <i>P</i> |
| PIPO 1 yr post-fire  | NA    | 0.157    | 1985  | 0.046    | NA    | 0.108    | 1991  | 0.009    |
| PIPO 5 yr post-fire  | 1994  | <0.001   | 1983  | <0.001   | 1996  | <0.001   | 1990  | <0.001   |
| PIPO 10 yr post-fire | 1994  | <0.001   | 1983  | <0.001   | 1996  | <0.001   | 1990  | <0.001   |
| PSME 1 yr post-fire  | NA    | 0.550    | NA    | NA       | 1996  | <0.001   | NA    | 0.088    |
| PSME 5 yr post-fire  | NA    | 0.088    | NA    | NA       | 1996  | <0.001   | 1991  | <0.001   |
| PSME 10 yr post-fire | 1984  | <0.001   | NA    | NA       | 1992  | <0.001   | 1991  | <0.001   |

## References

1. Rother MT, Veblen TT (2017) Climate Drives Episodic Conifer Establishment after Fire in Dry Ponderosa Pine Forests of the Colorado Front Range, USA. *Forests* 8(5): 159.
2. Holden ZA, et al. (2018) Decreasing fire season precipitation increased recent western US forest wildfire activity. *Proc Natl Acad Sci USA* 115(36):E8349-E8357.
3. Maneta MP, Silverman NL (2013) A Spatially Distributed Model to Simulate Water, Energy, and Vegetation Dynamics Using Information from Regional Climate Models. *Earth Interactions* 17(11):1-44.
4. Simeone C, et al. (2018) Coupled ecohydrology and plant hydraulics modeling predicts ponderosa pine seedling mortality and lower treeline in the U.S. Northern Rocky Mountains. *New Phytol.* doi: 10.1111/nph.15499. Published online 27 September 2018.
5. Hoylman Z, Jencso K, Hu J, Holden ZA, Martin J (2018) Hydrology across the critical zone: Topography and climate controls on spatial and temporal organization of vapor pressure deficits, soil moisture and shallow subsurface flow. *Water Resources Research* In Press.
6. Youden WJ (1950) Index for rating diagnostic tests. *Cancer* 3(1):32-35.
7. Dobrowski SZ, et al. (2013) The climate velocity of the contiguous United States during the 20th century. *Glob Chang Biol* 19(1):241-251.
8. Mason SJ, Graham NE (2002) Areas beneath the relative operating characteristics (ROC) and relative operating levels (ROL) curves: Statistical significance and interpretation. *Quarterly Journal of the Royal Meteorological Society* 128(584):2145-2166.
9. Hand DJ (2009) Measuring classifier performance: a coherent alternative to the area under the ROC curve. *Machine Learning* 77(1):103-123.
